# Supplementary material
Source: ML conference proceedings conference paper supplement (https://openreview.net/forum?id=Q7I6vYRHJg)

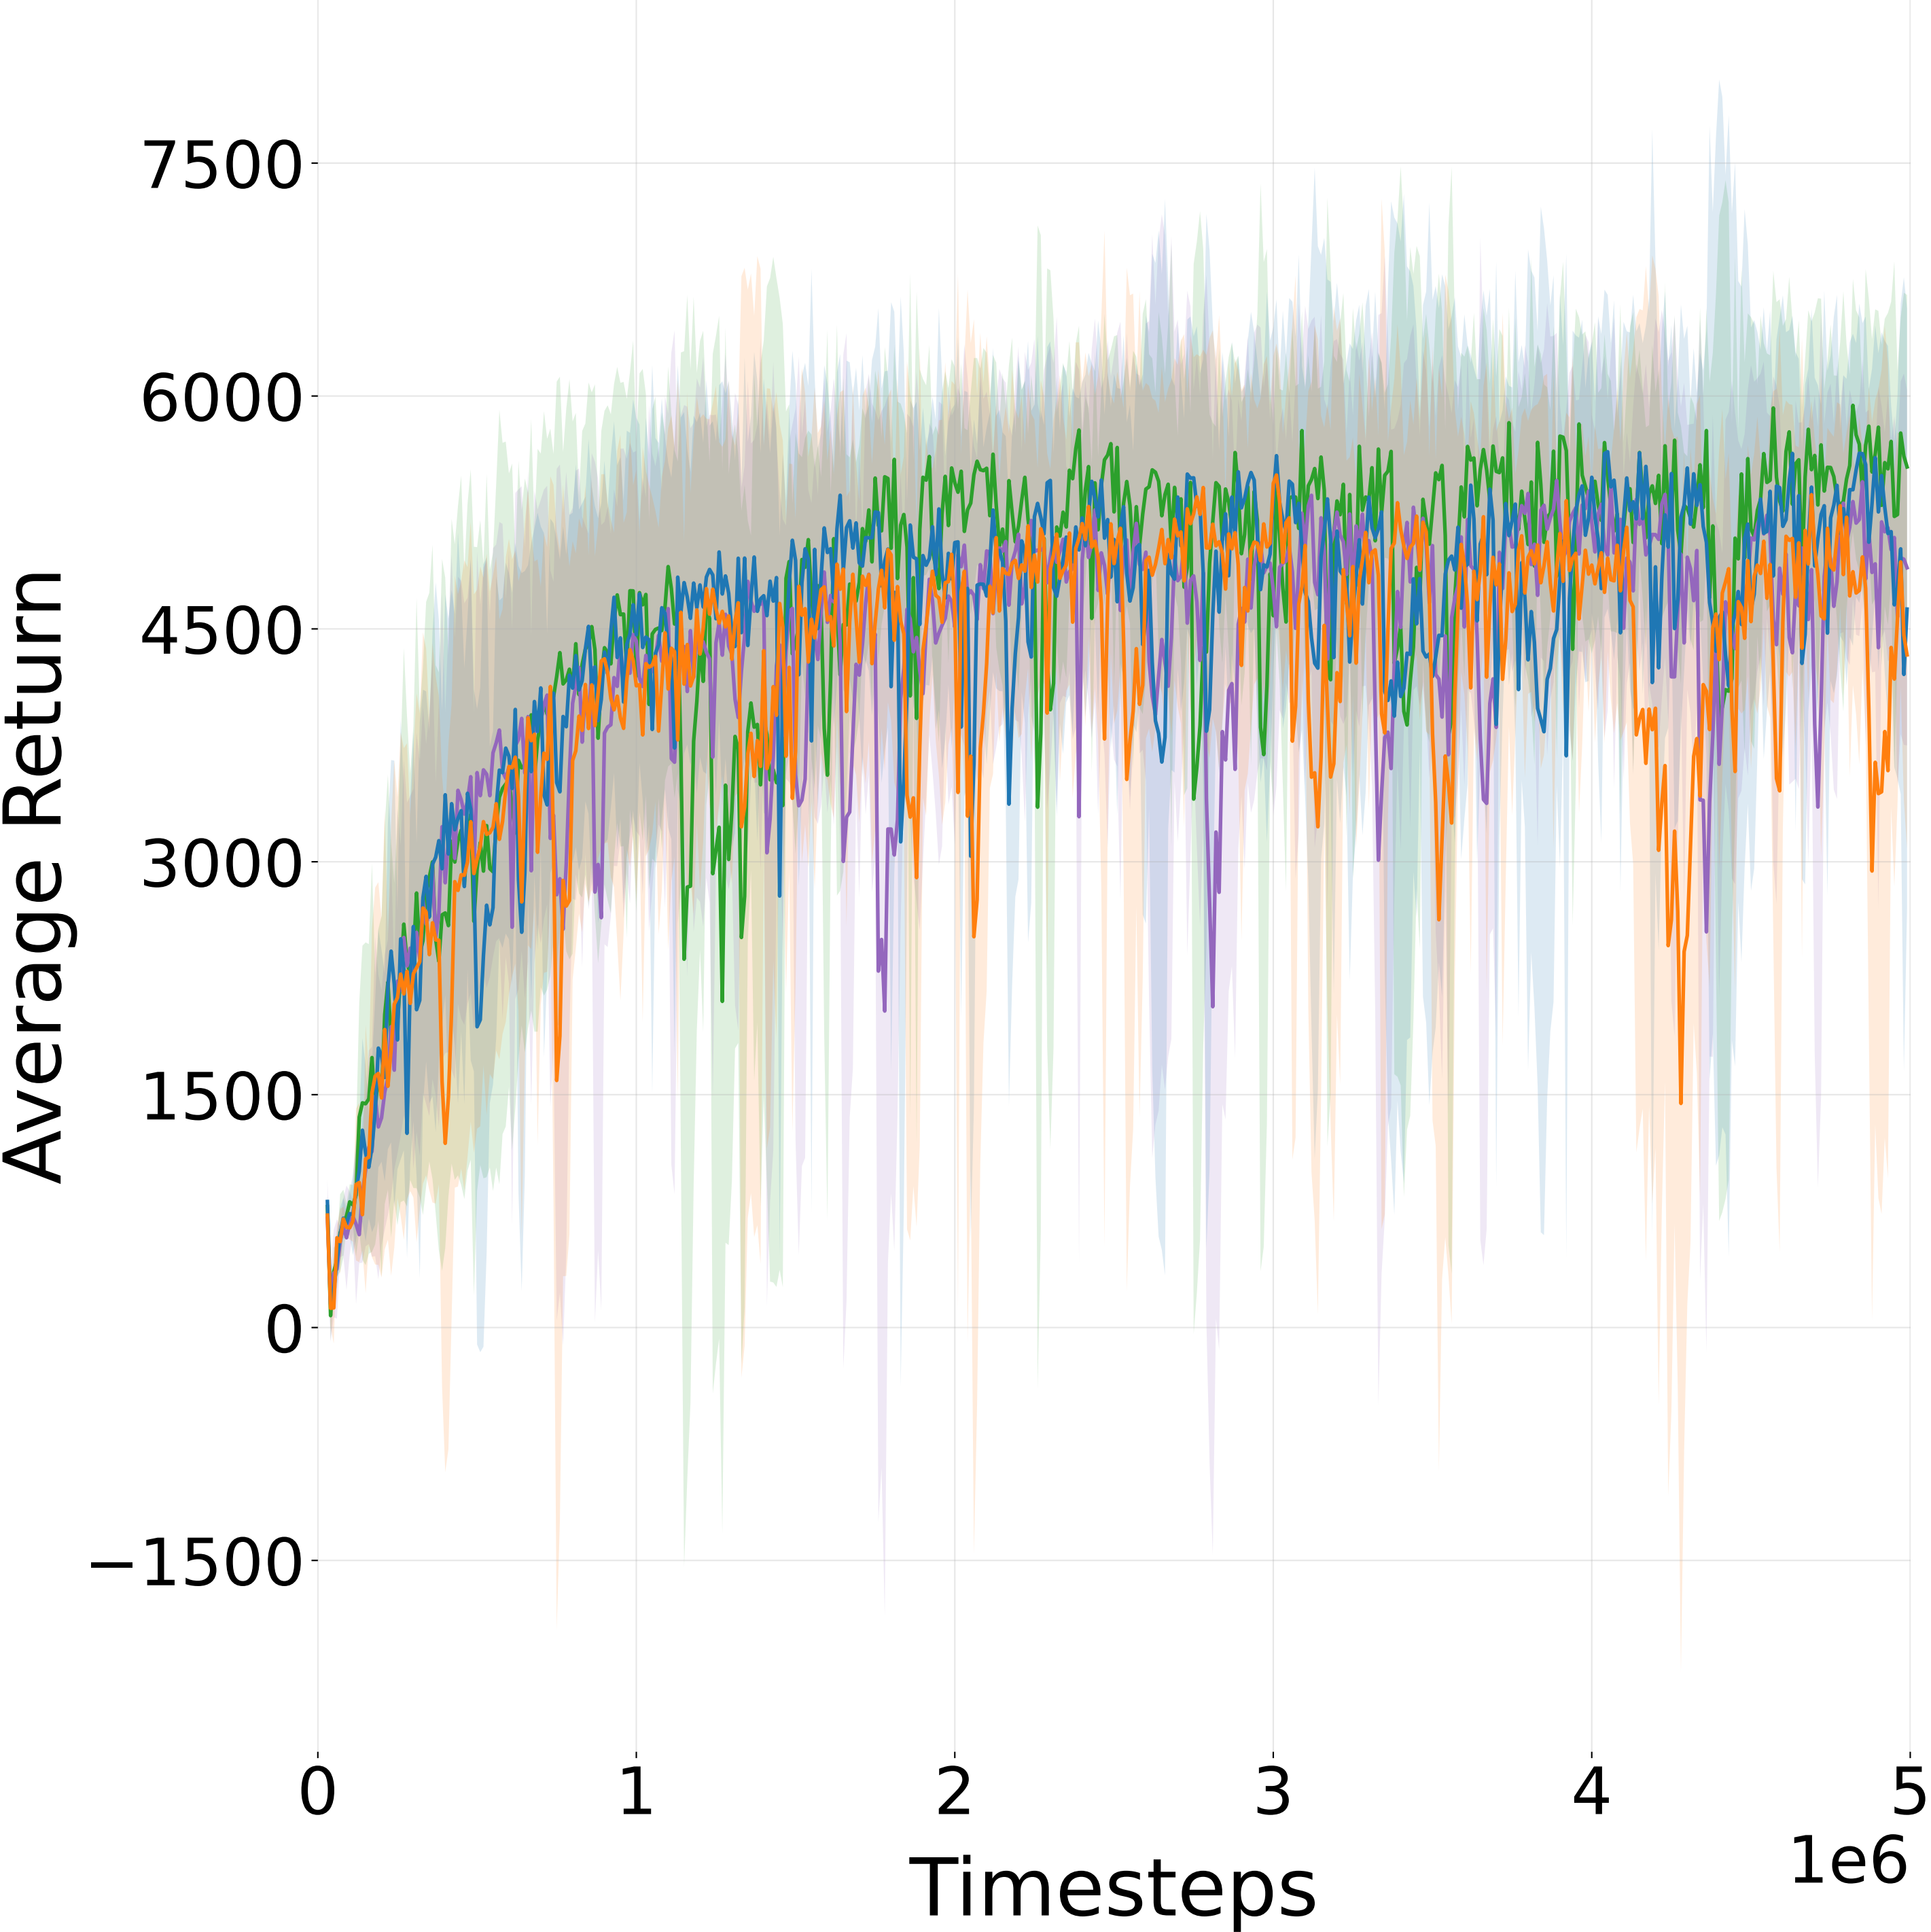

Supplement: supplementary_material [file Ant-v4_beta.pdf › FQL/figures/Beta/Ant-v4_beta.pdf]

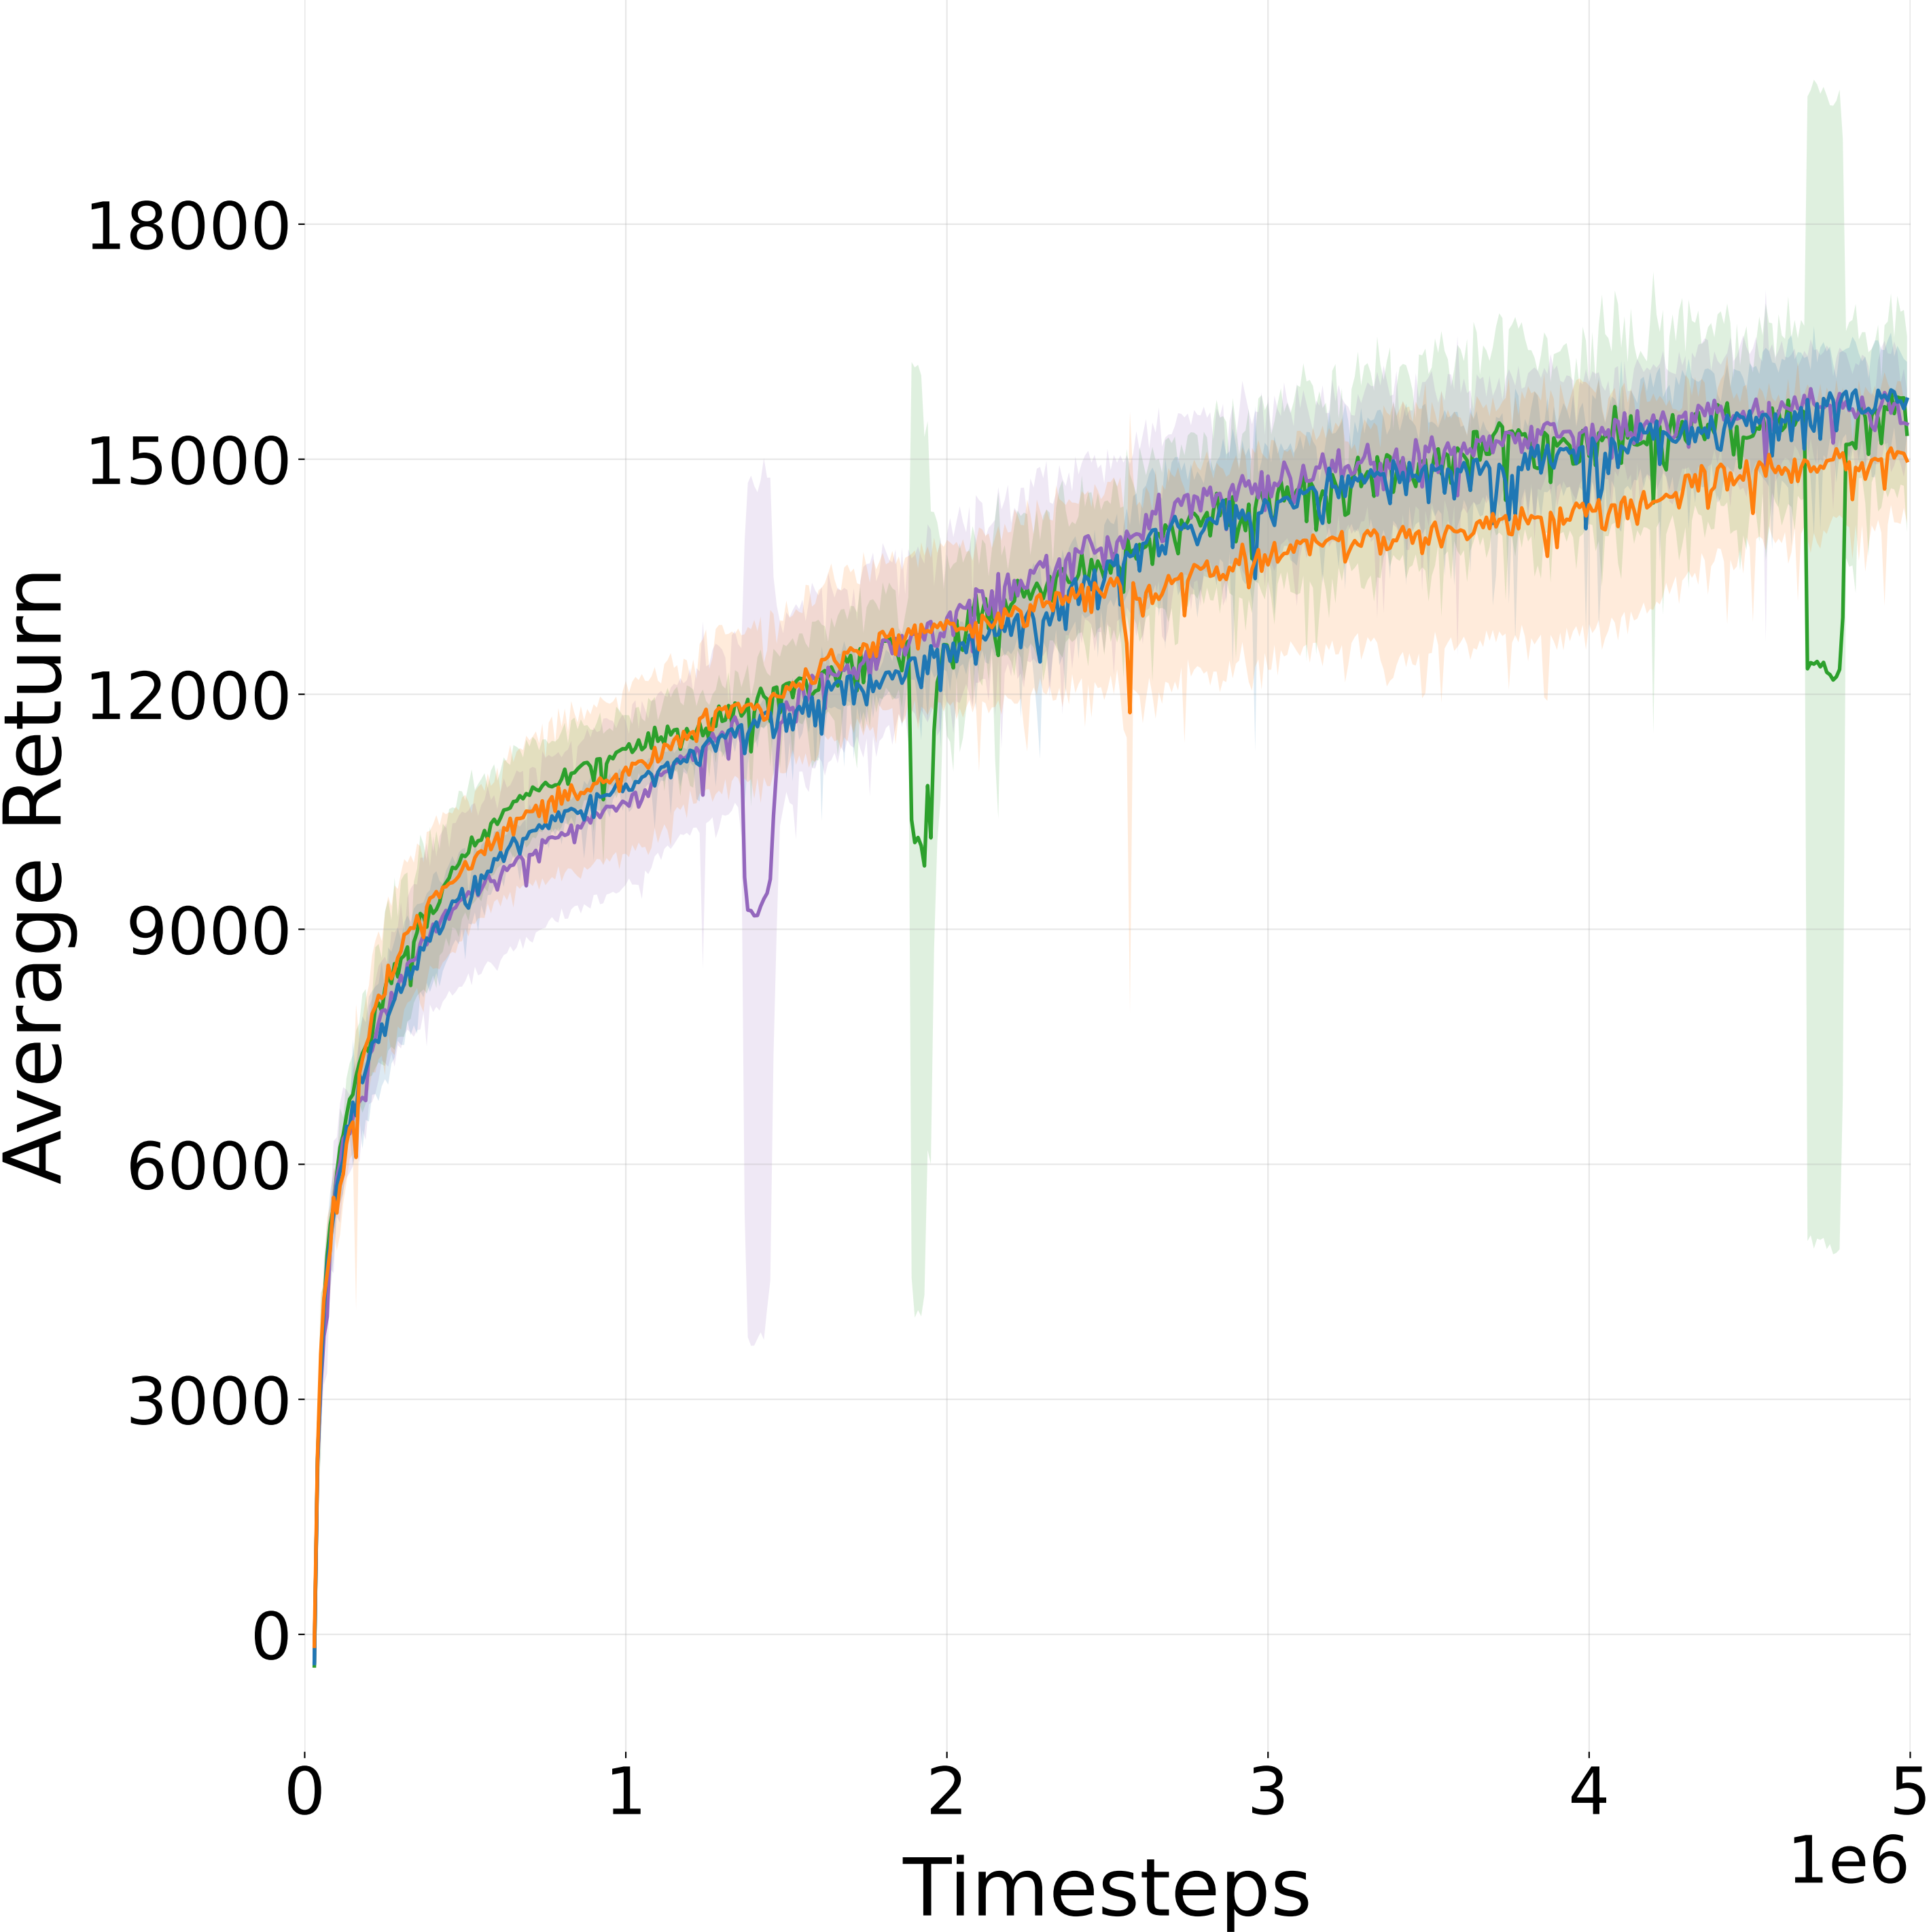

Supplement: supplementary_material [file HalfCheetah-v4_beta.pdf › FQL/figures/Beta/HalfCheetah-v4_beta.pdf]

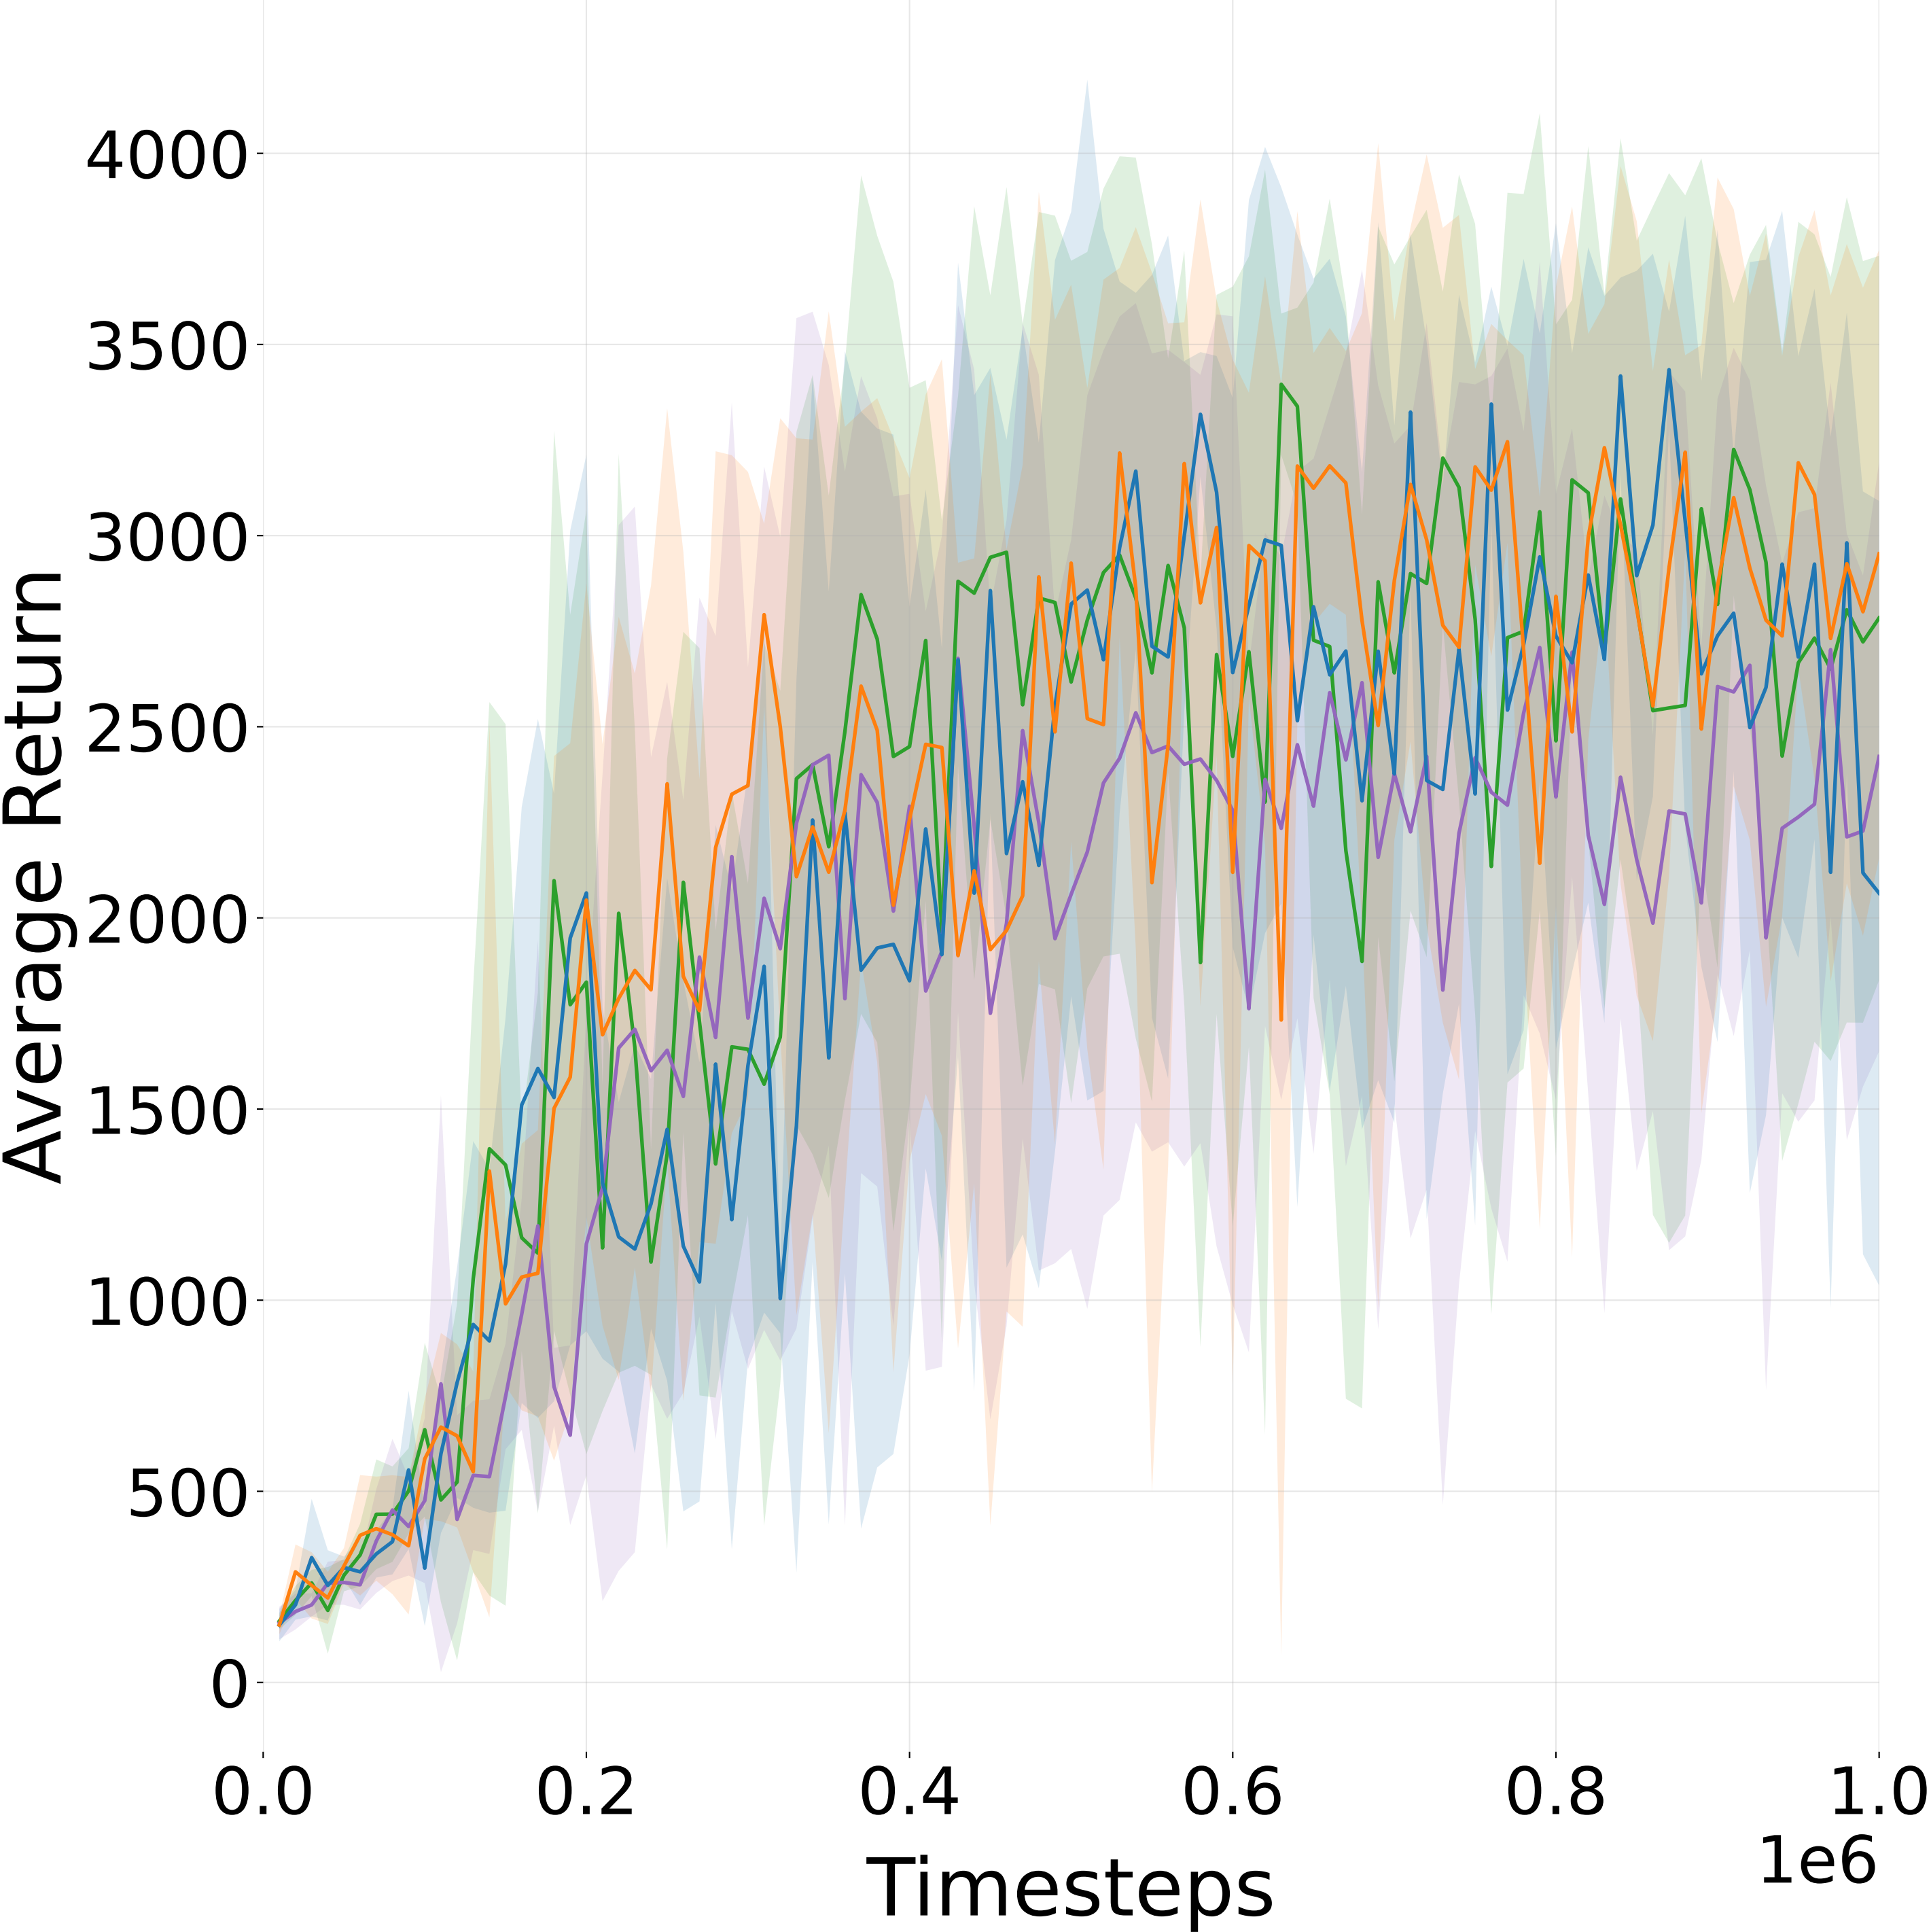

Supplement: supplementary_material [file Hopper-v4_beta.pdf › FQL/figures/Beta/Hopper-v4_beta.pdf]

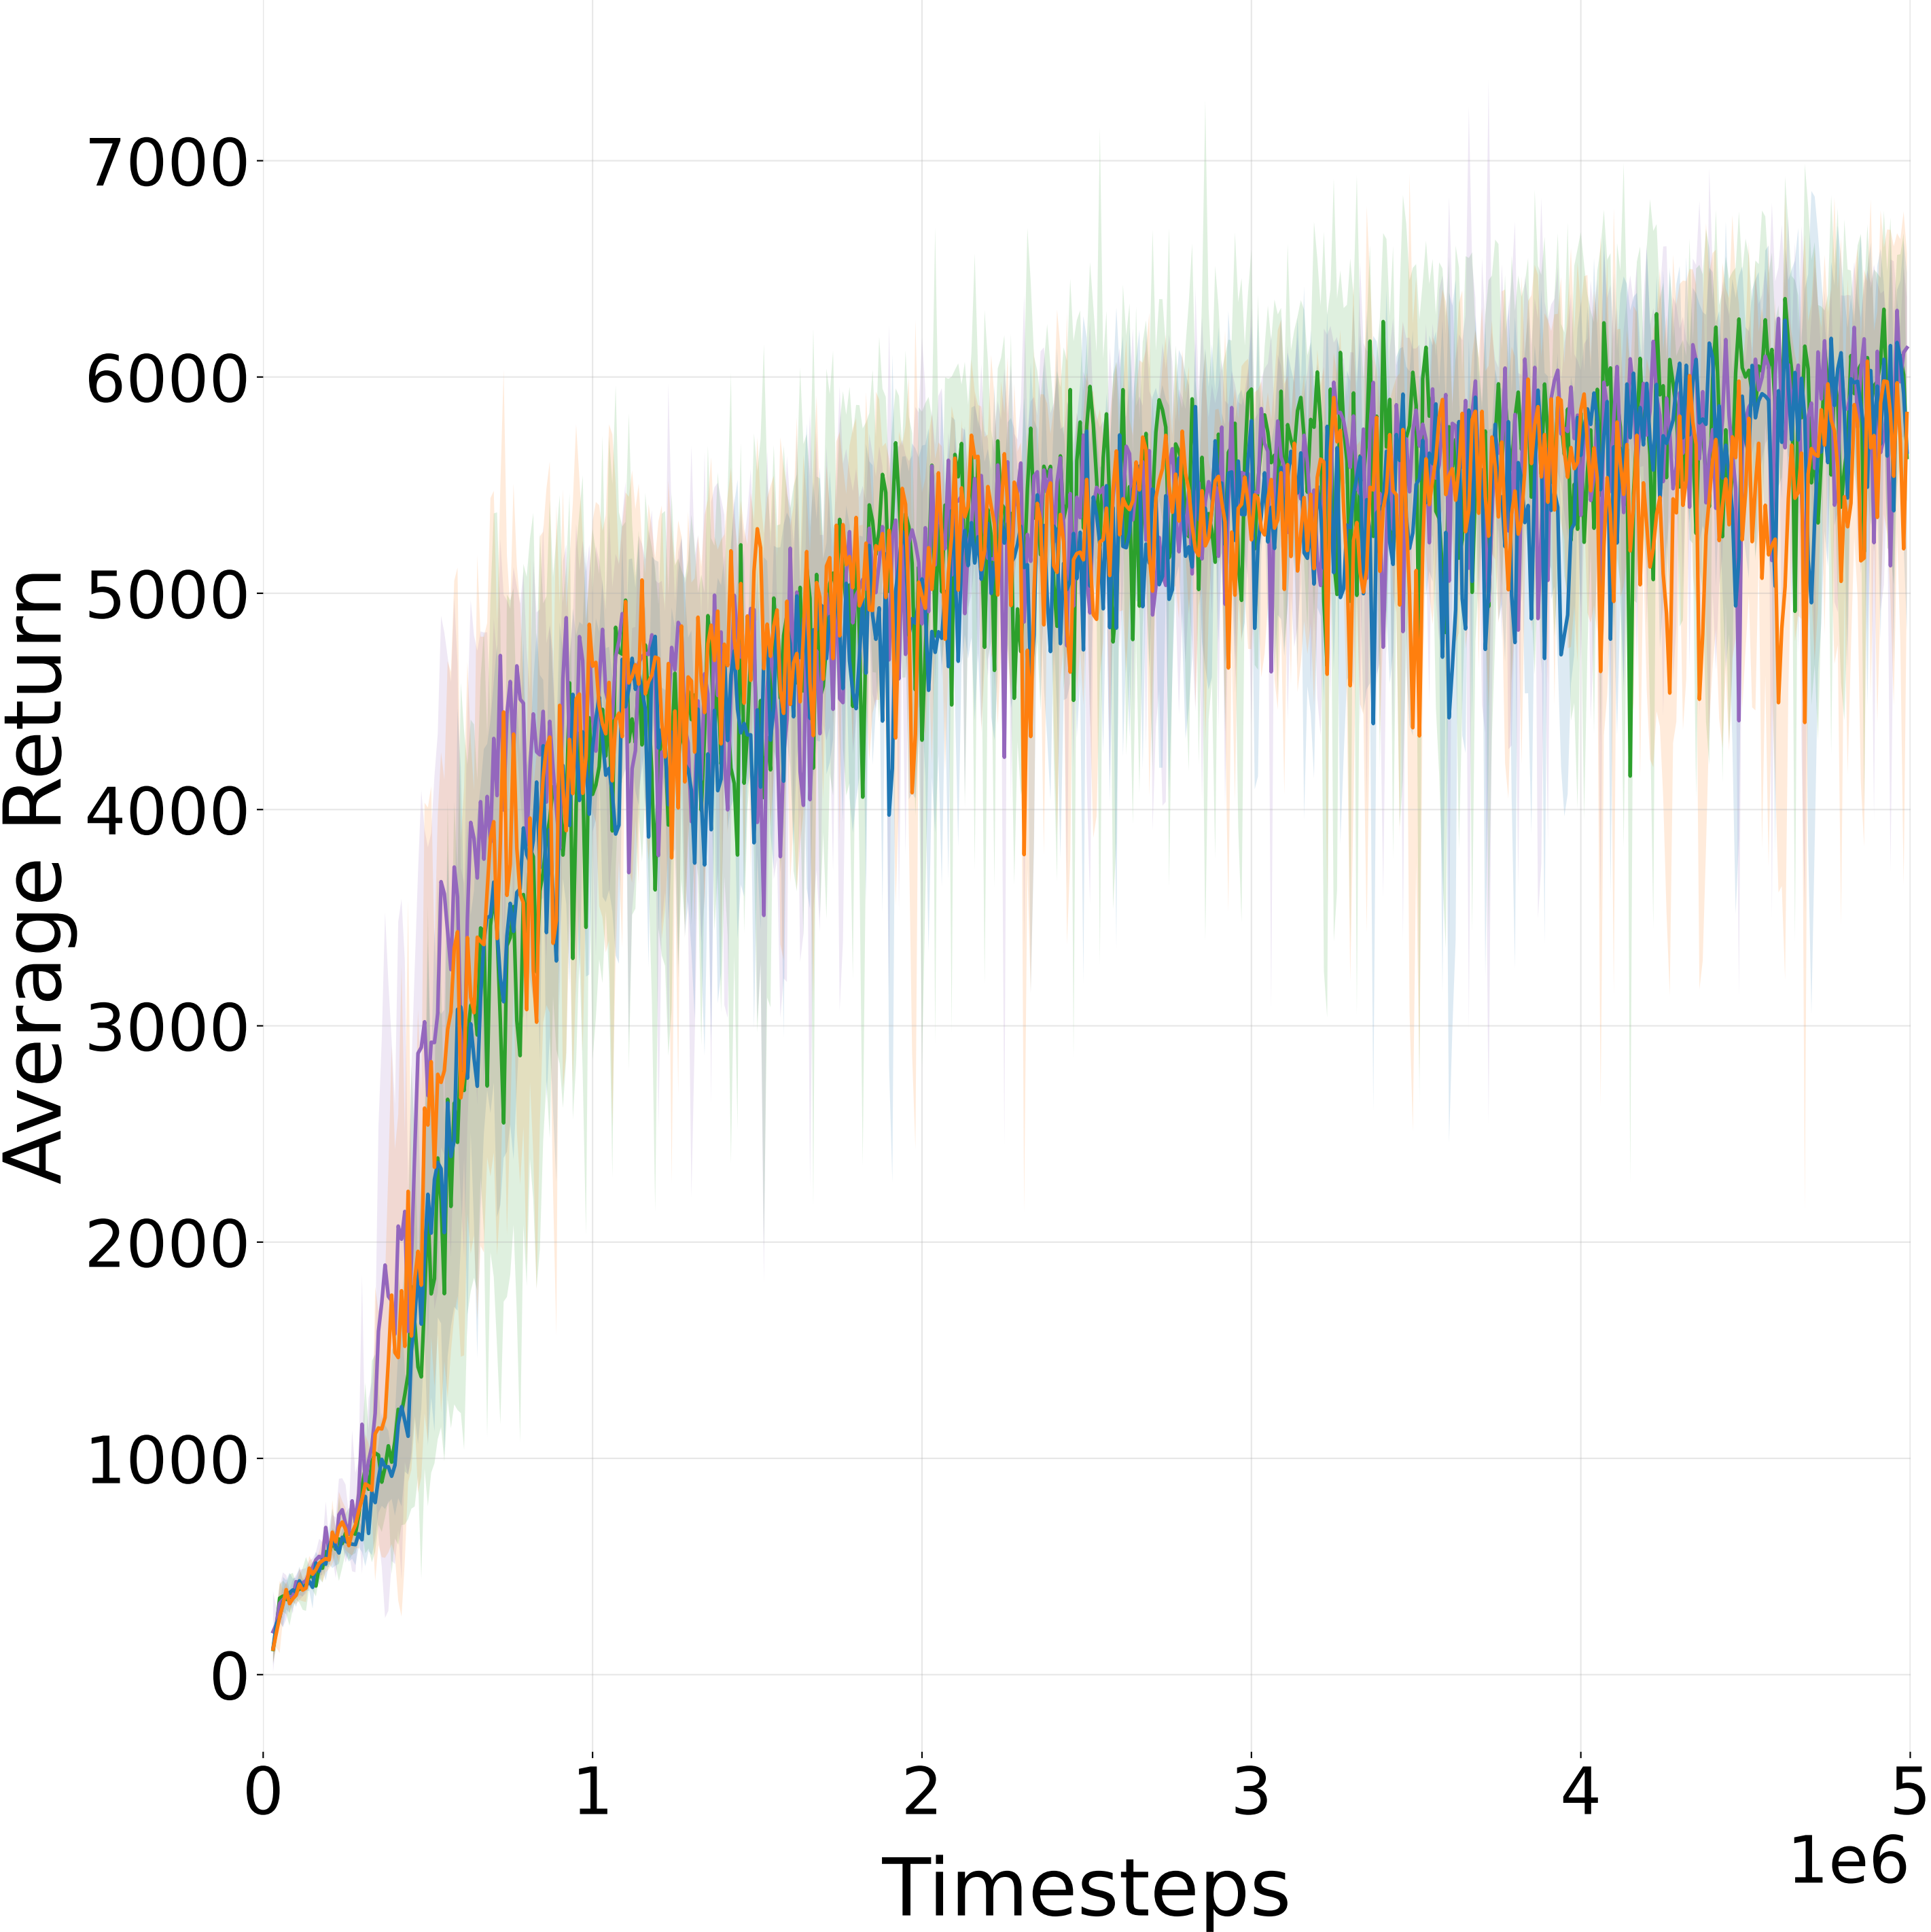

Supplement: supplementary_material [file Humanoid-v4_beta.pdf › FQL/figures/Beta/Humanoid-v4_beta.pdf]

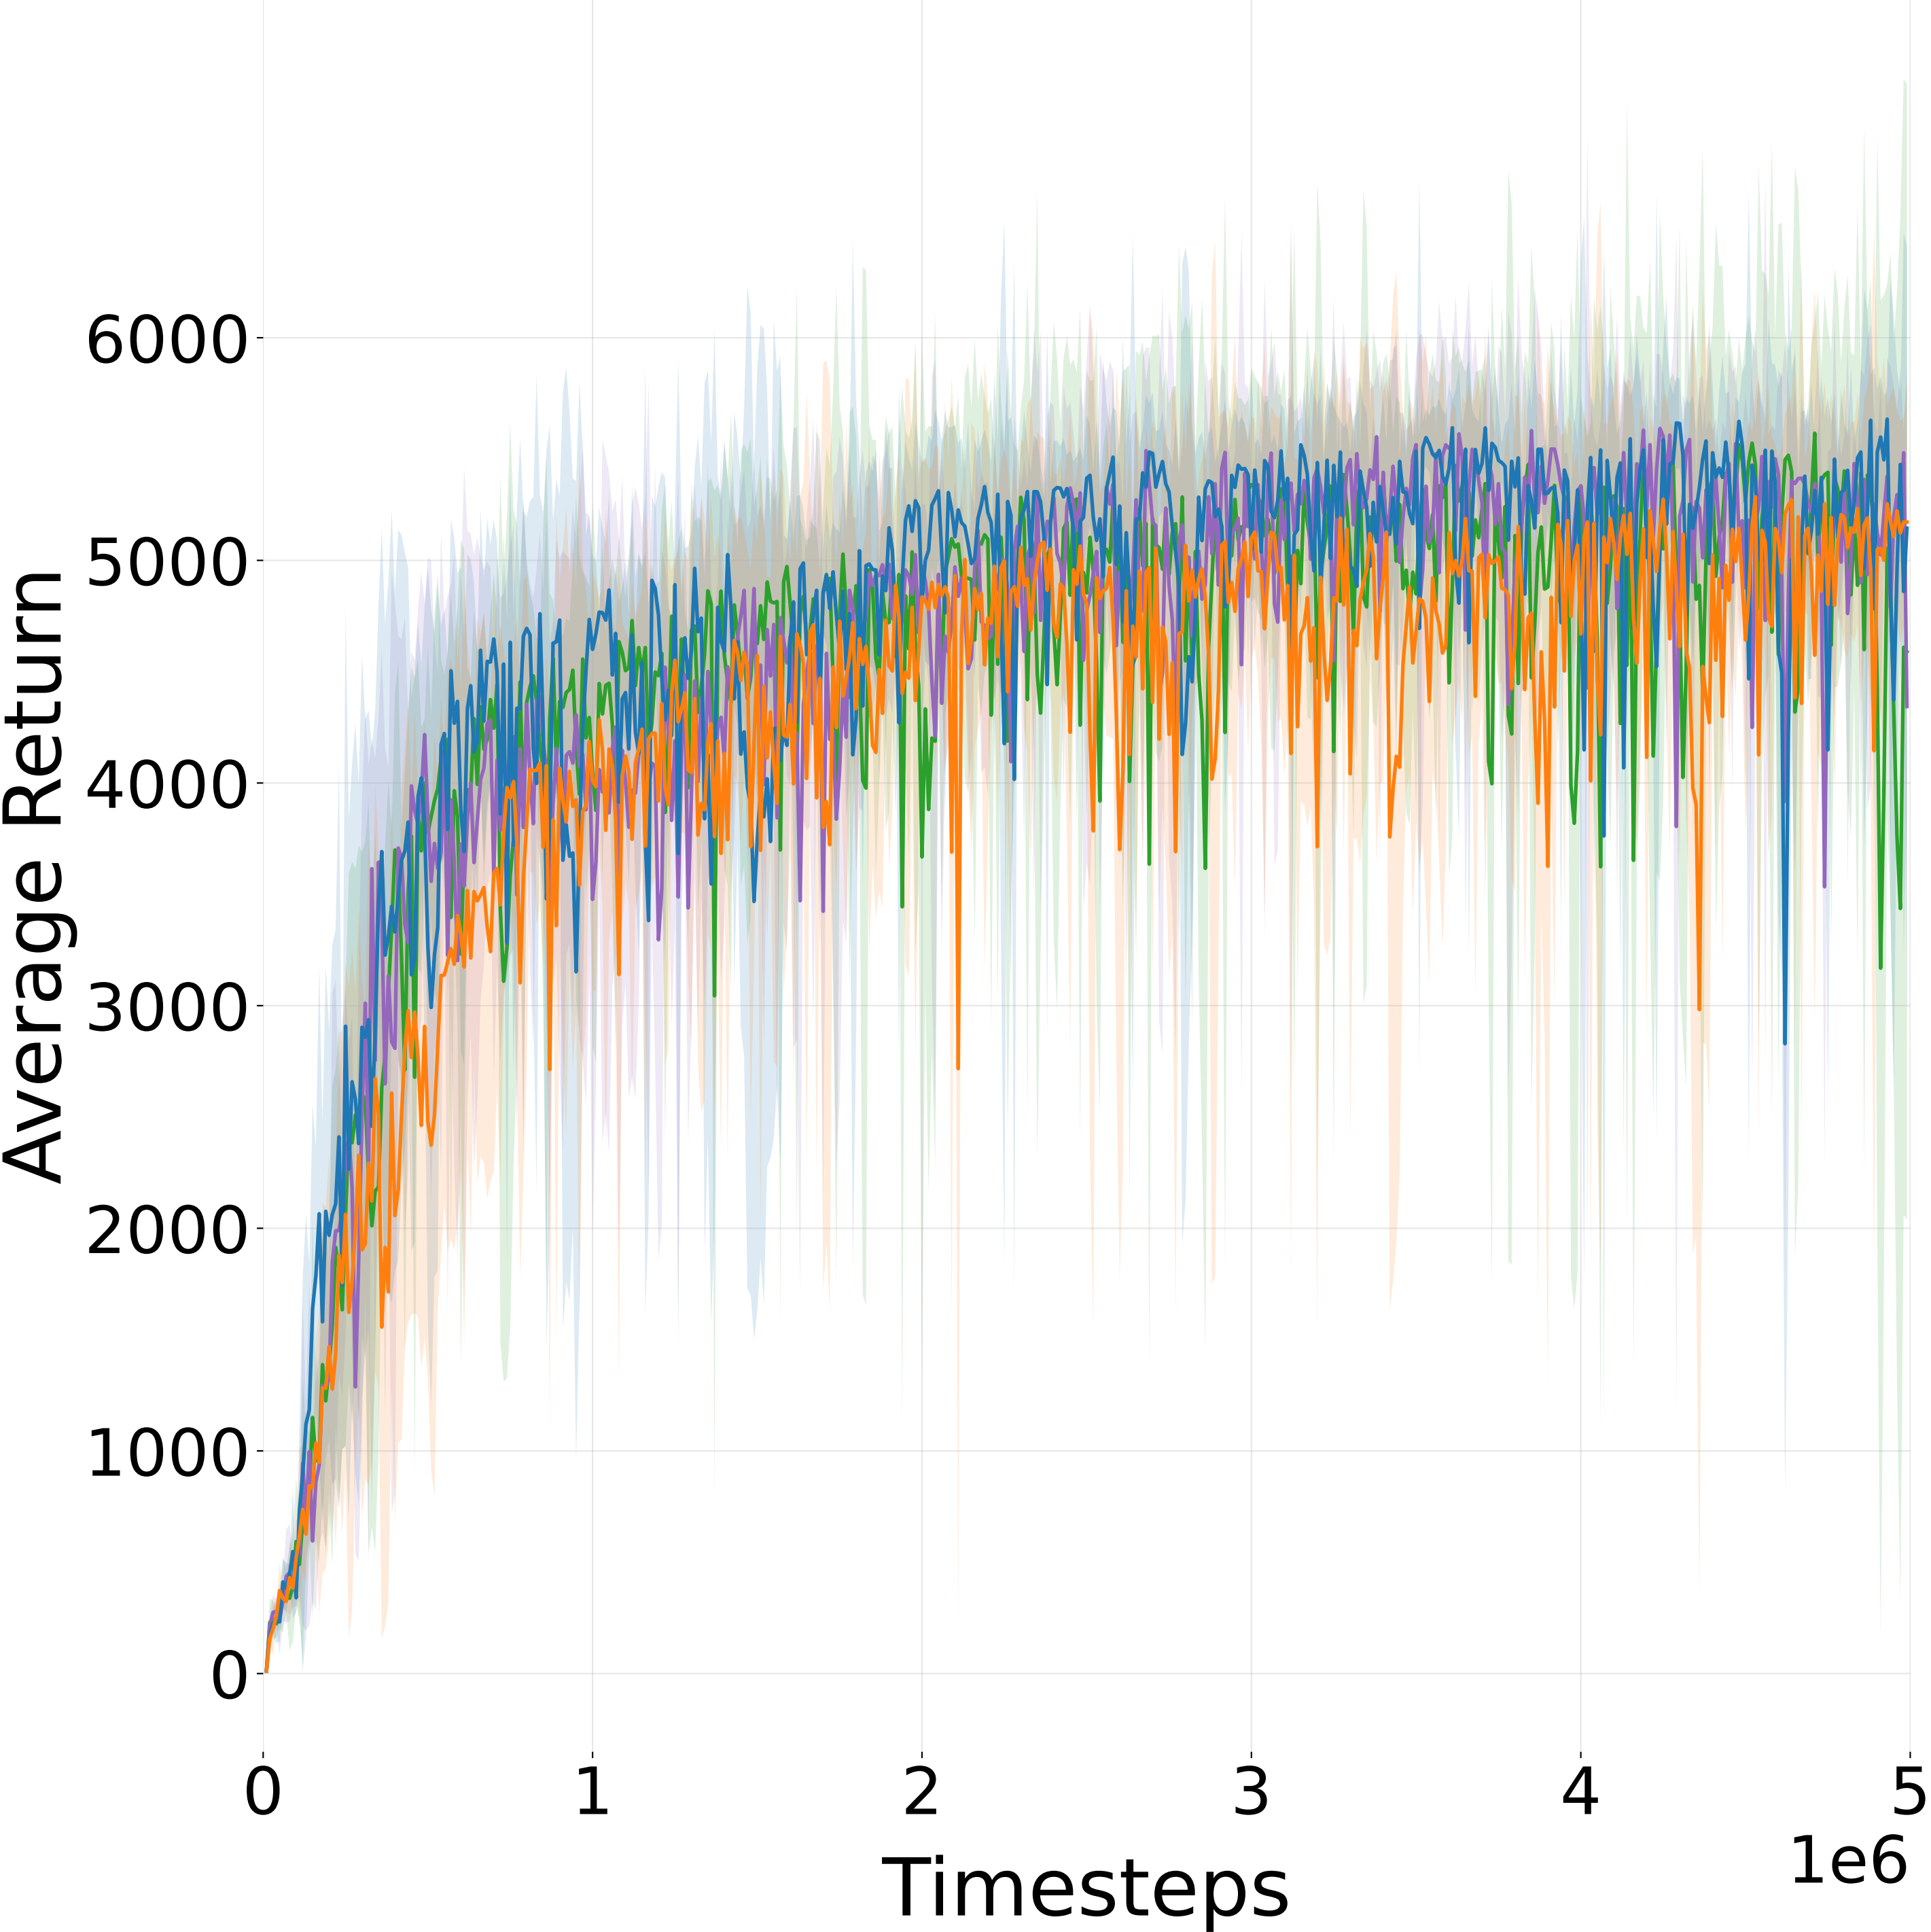

Supplement: supplementary_material [file Walker2d-v4_beta.pdf › FQL/figures/Beta/Walker2d-v4_beta.pdf]

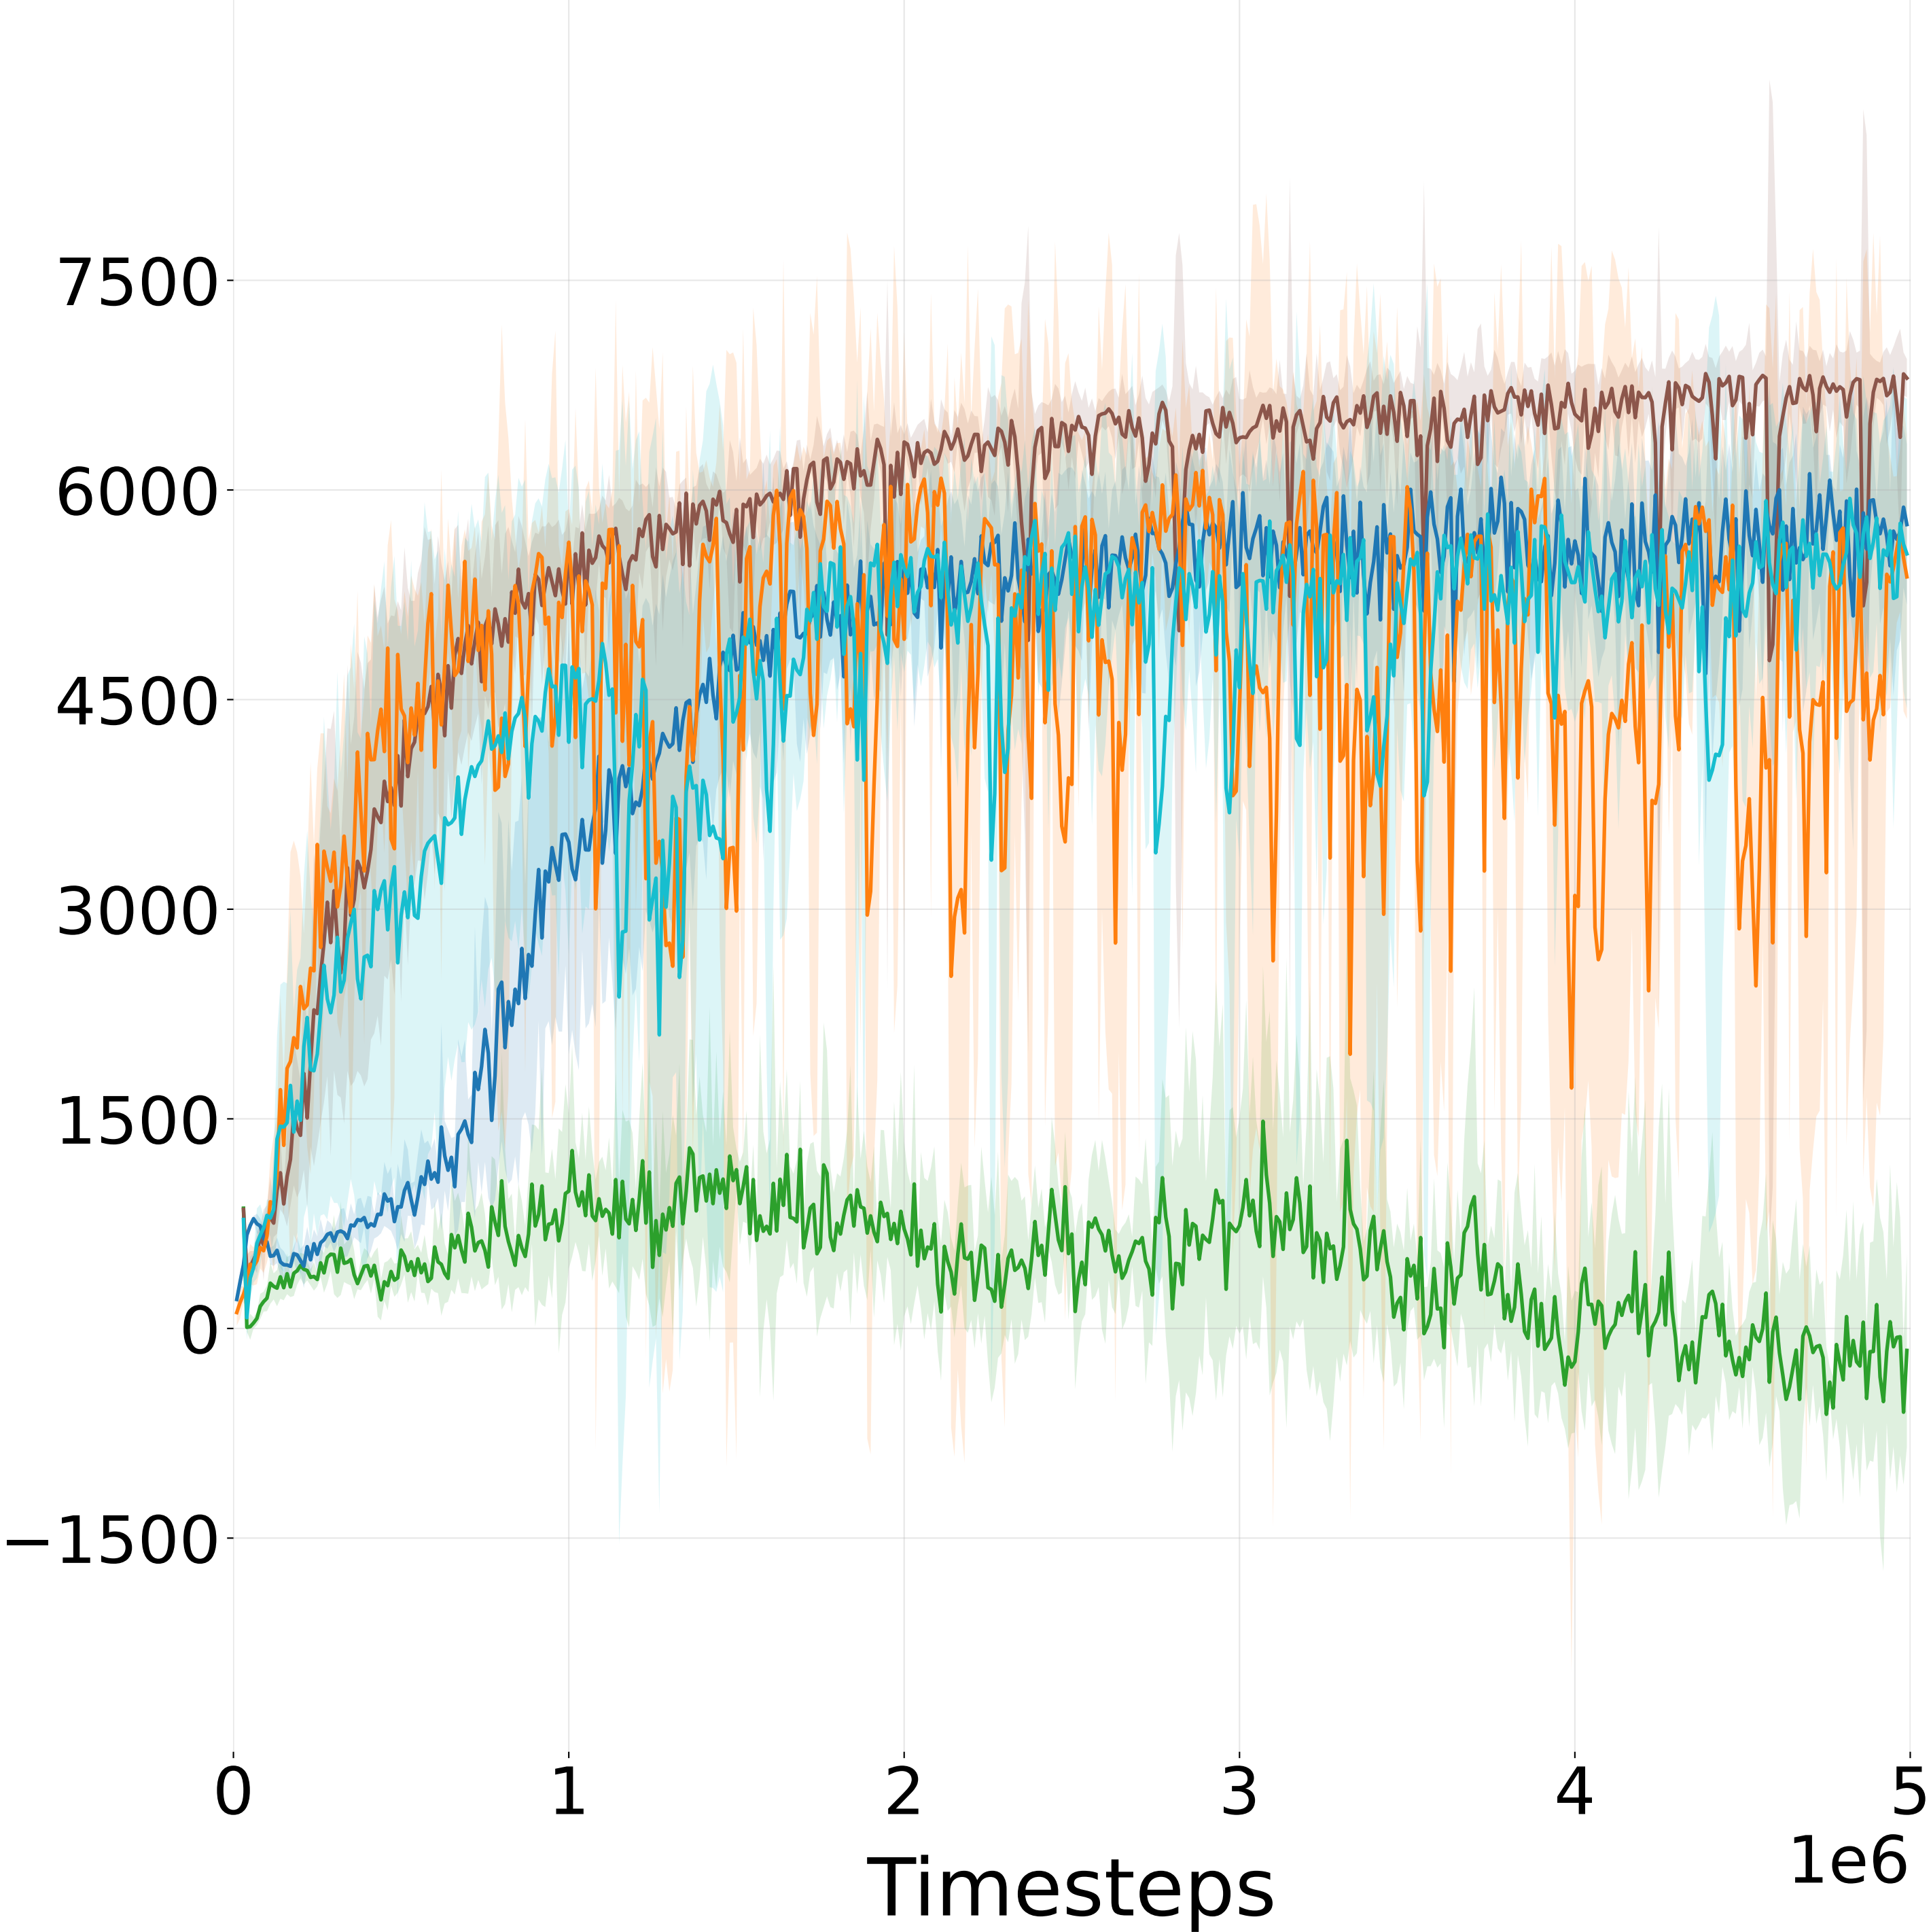

Supplement: supplementary_material [file Ant-v4.pdf › FQL/figures/Critic/Ant-v4.pdf]

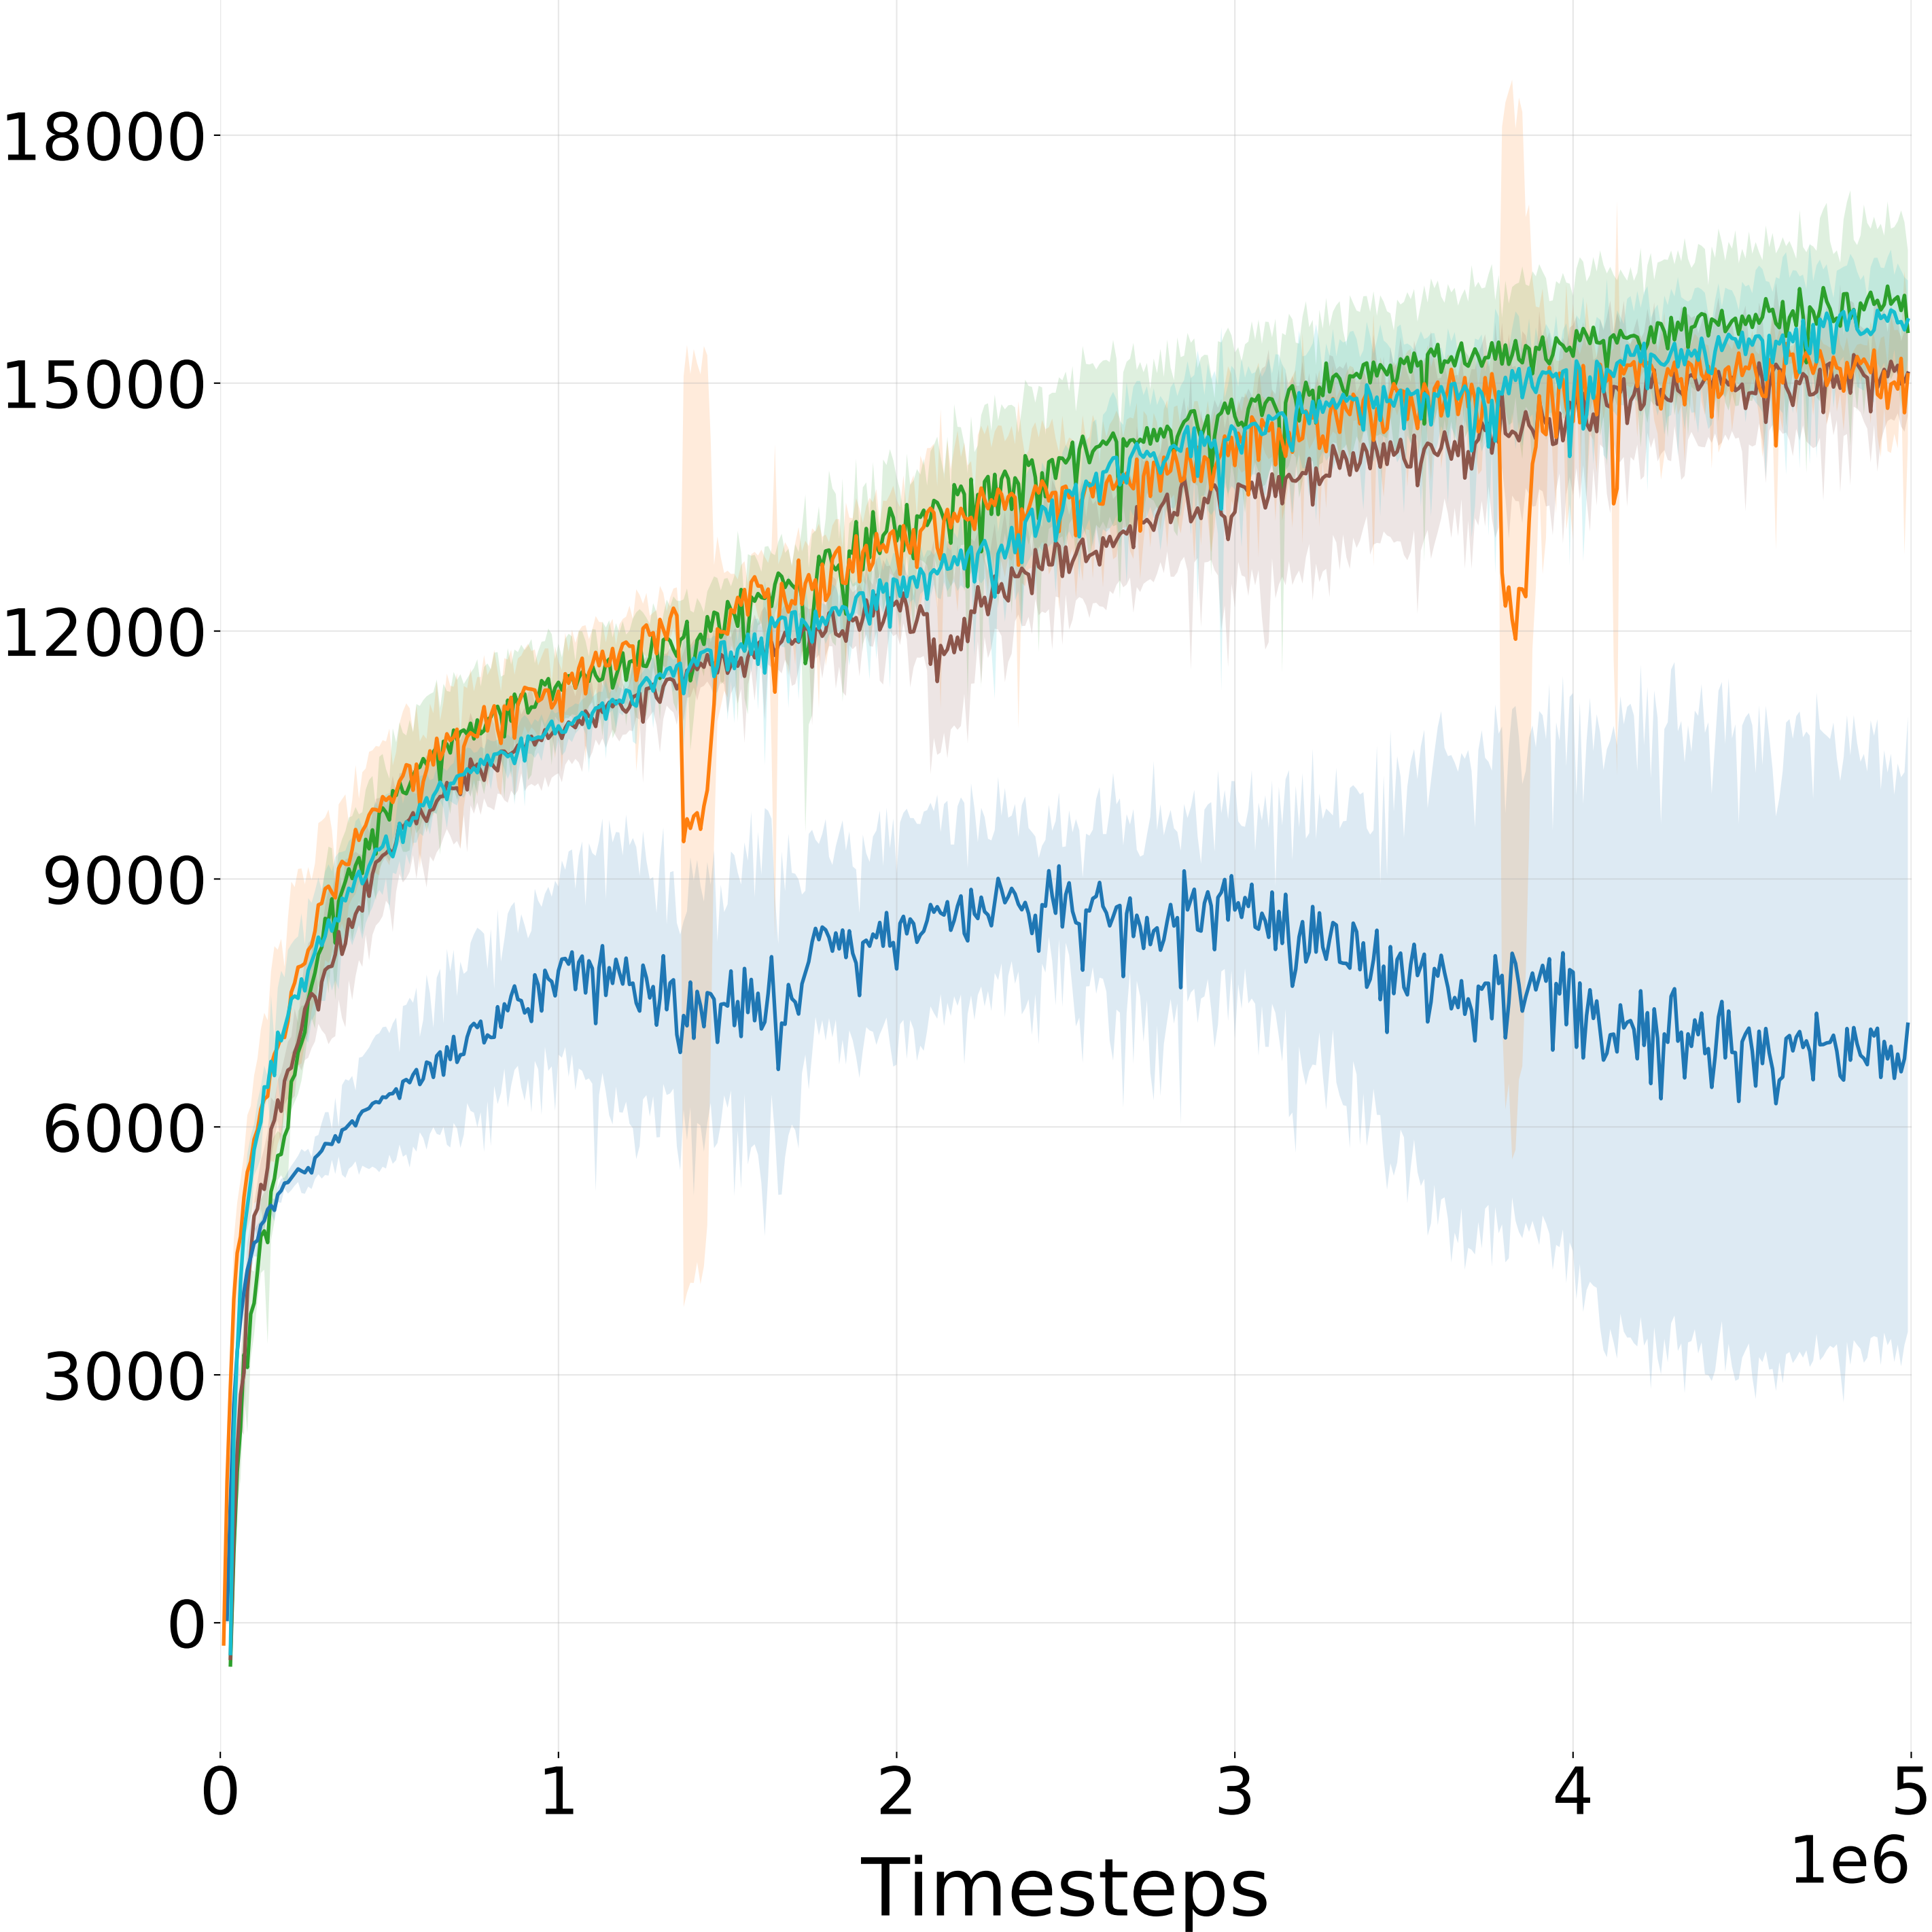

Supplement: supplementary_material [file HalfCheetah-v4.pdf › FQL/figures/Critic/HalfCheetah-v4.pdf]

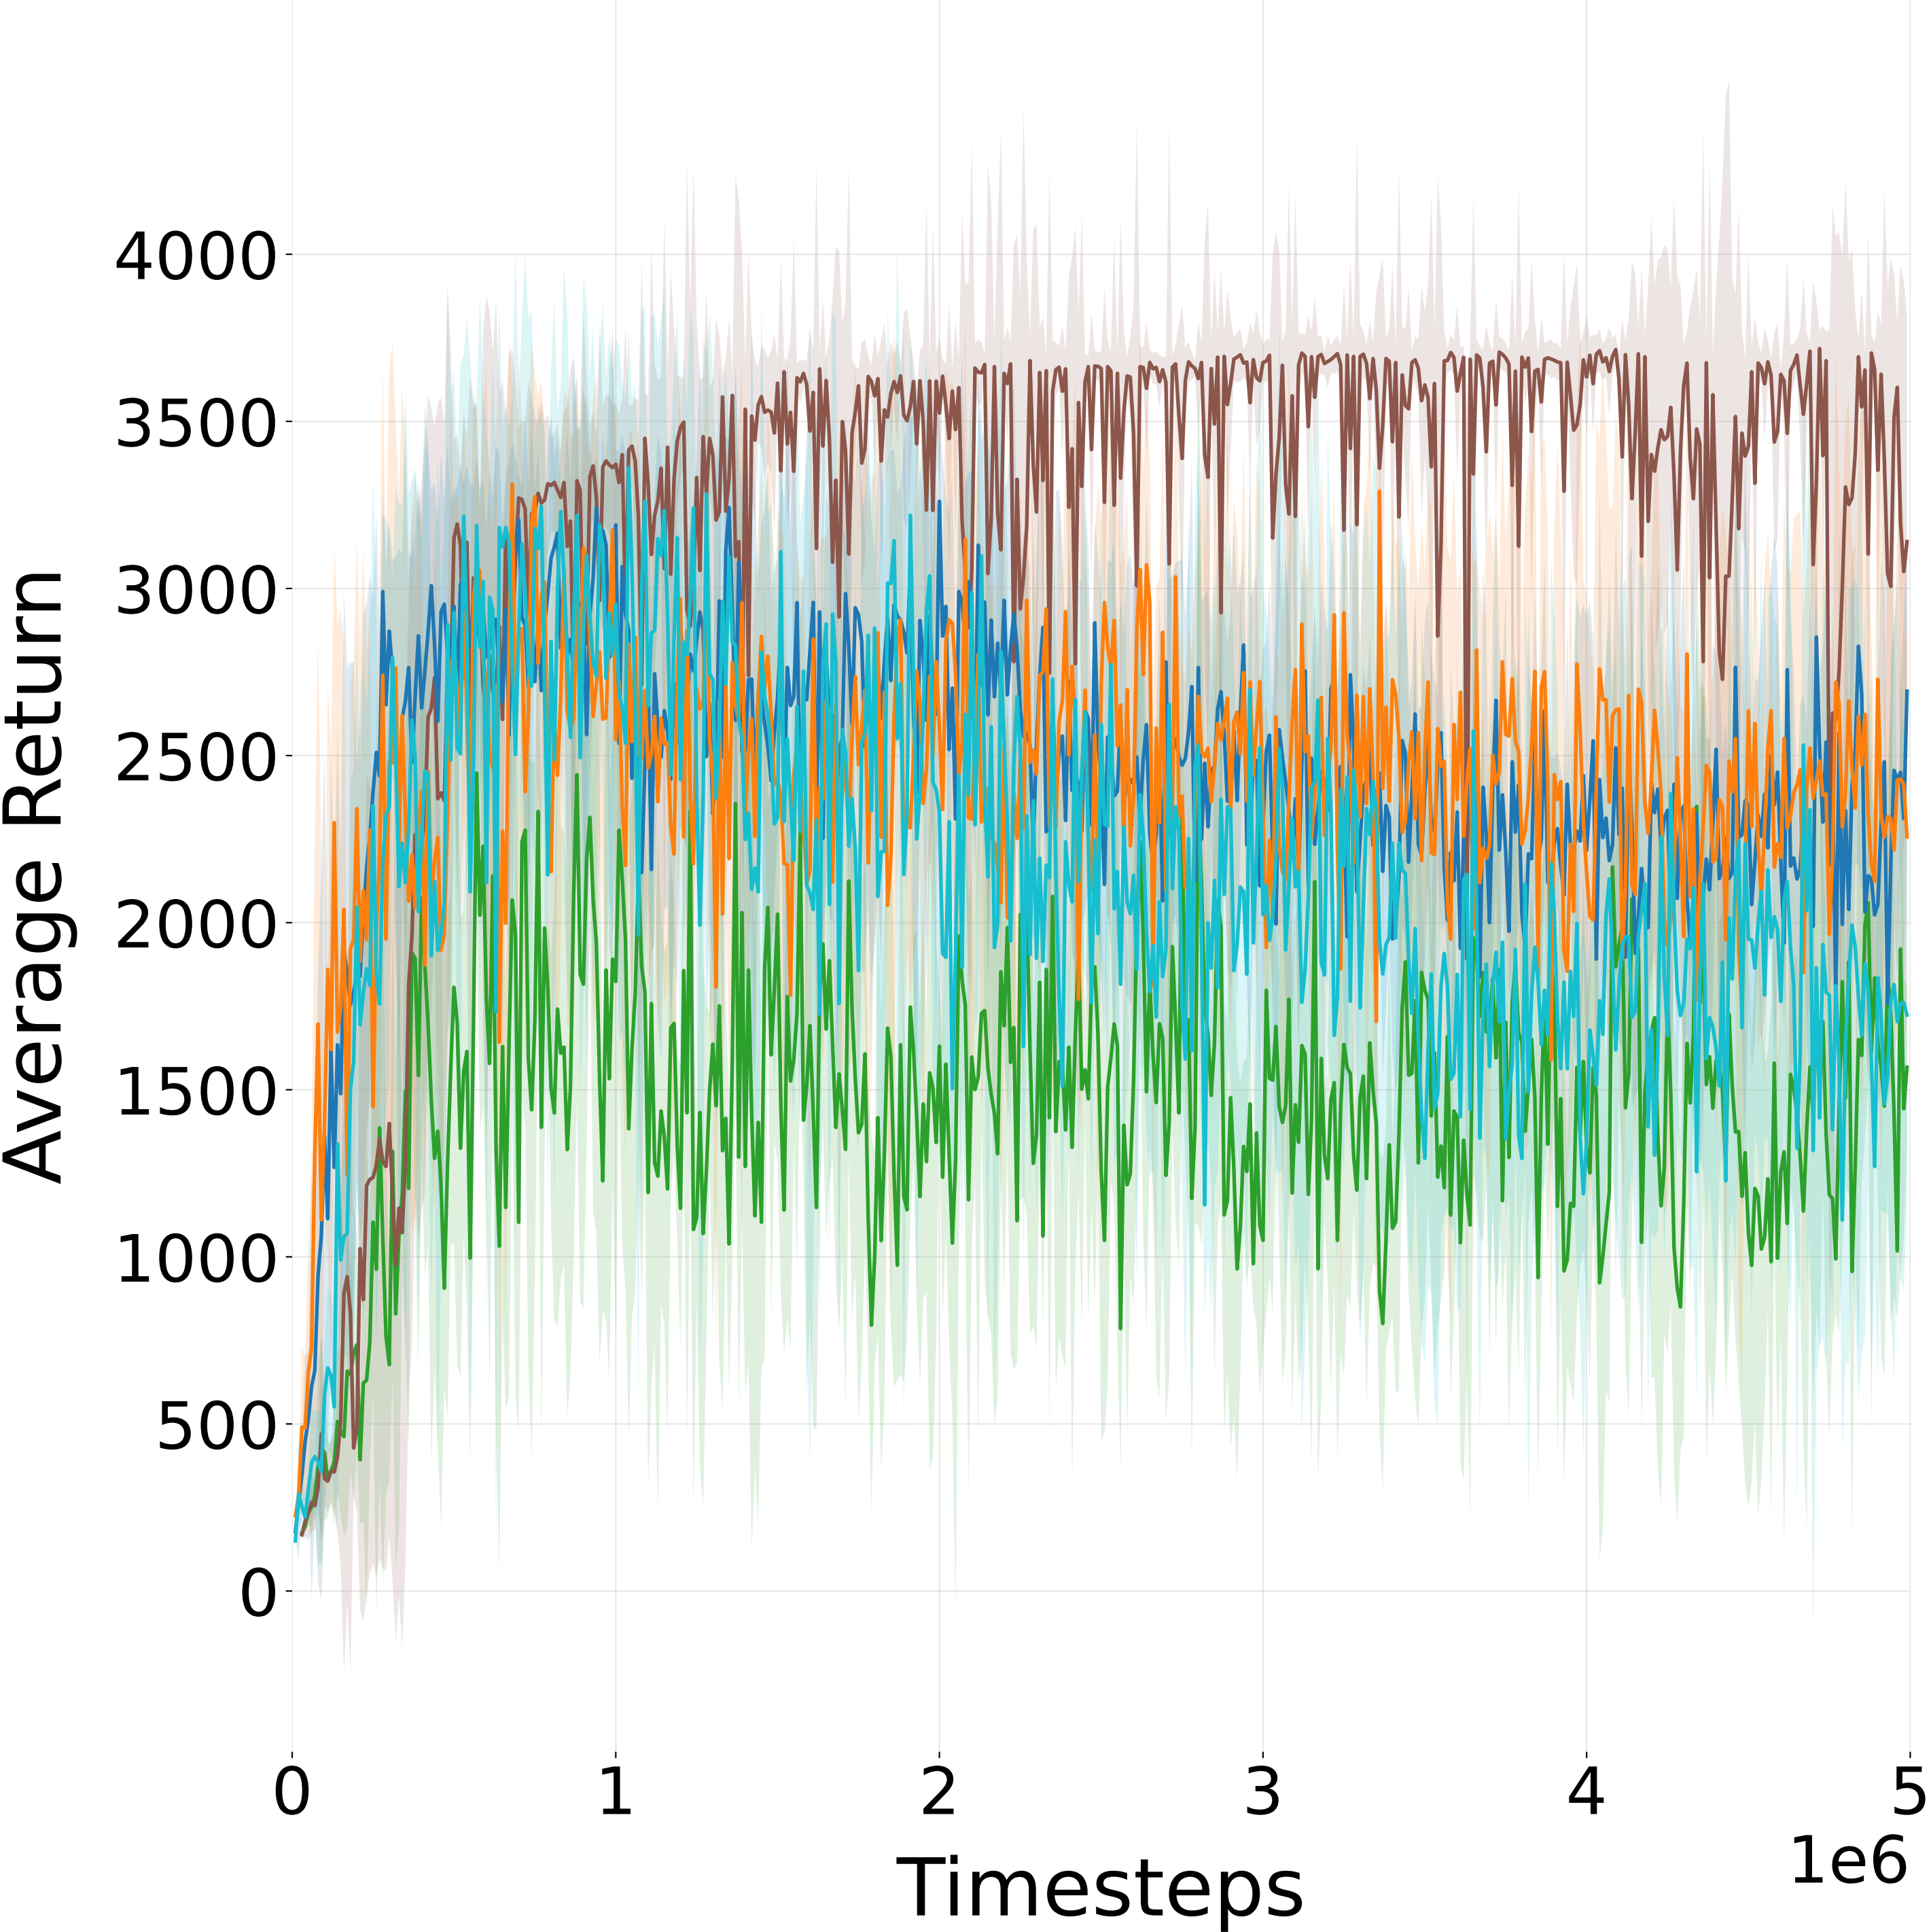

Supplement: supplementary_material [file Hopper-v4.pdf › FQL/figures/Critic/Hopper-v4.pdf]

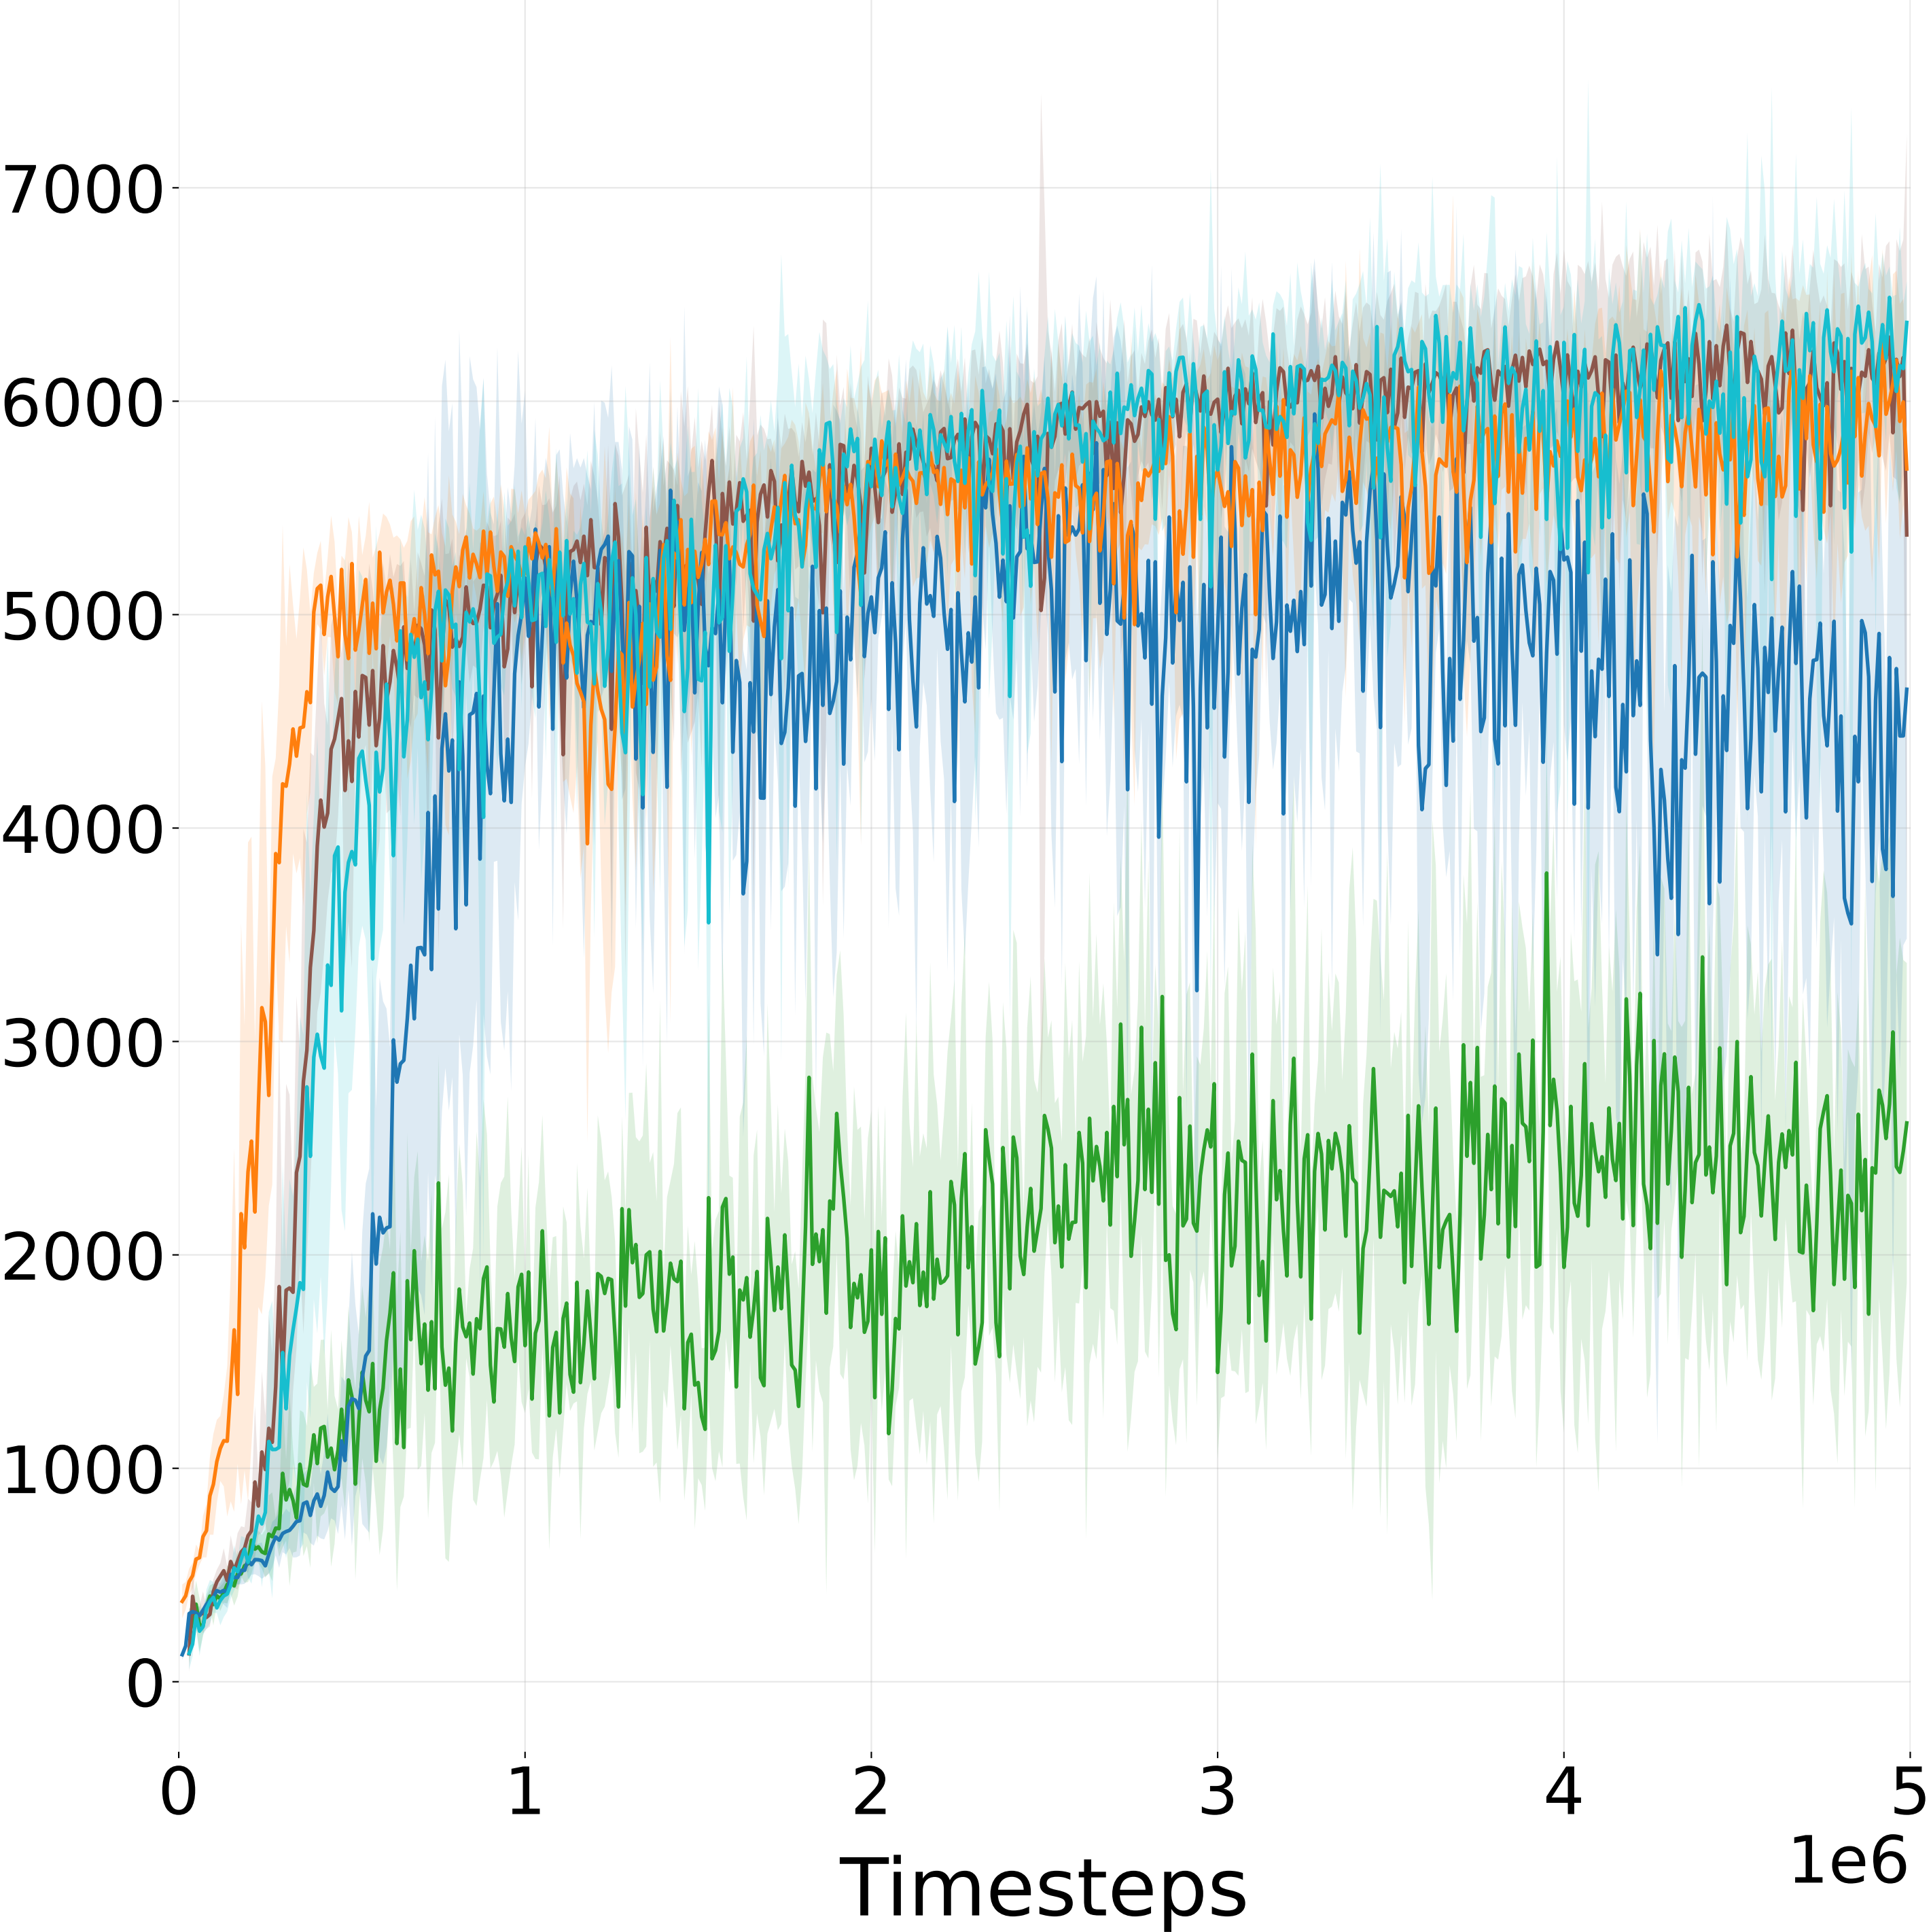

Supplement: supplementary_material [file Humanoid-v4.pdf › FQL/figures/Critic/Humanoid-v4.pdf]

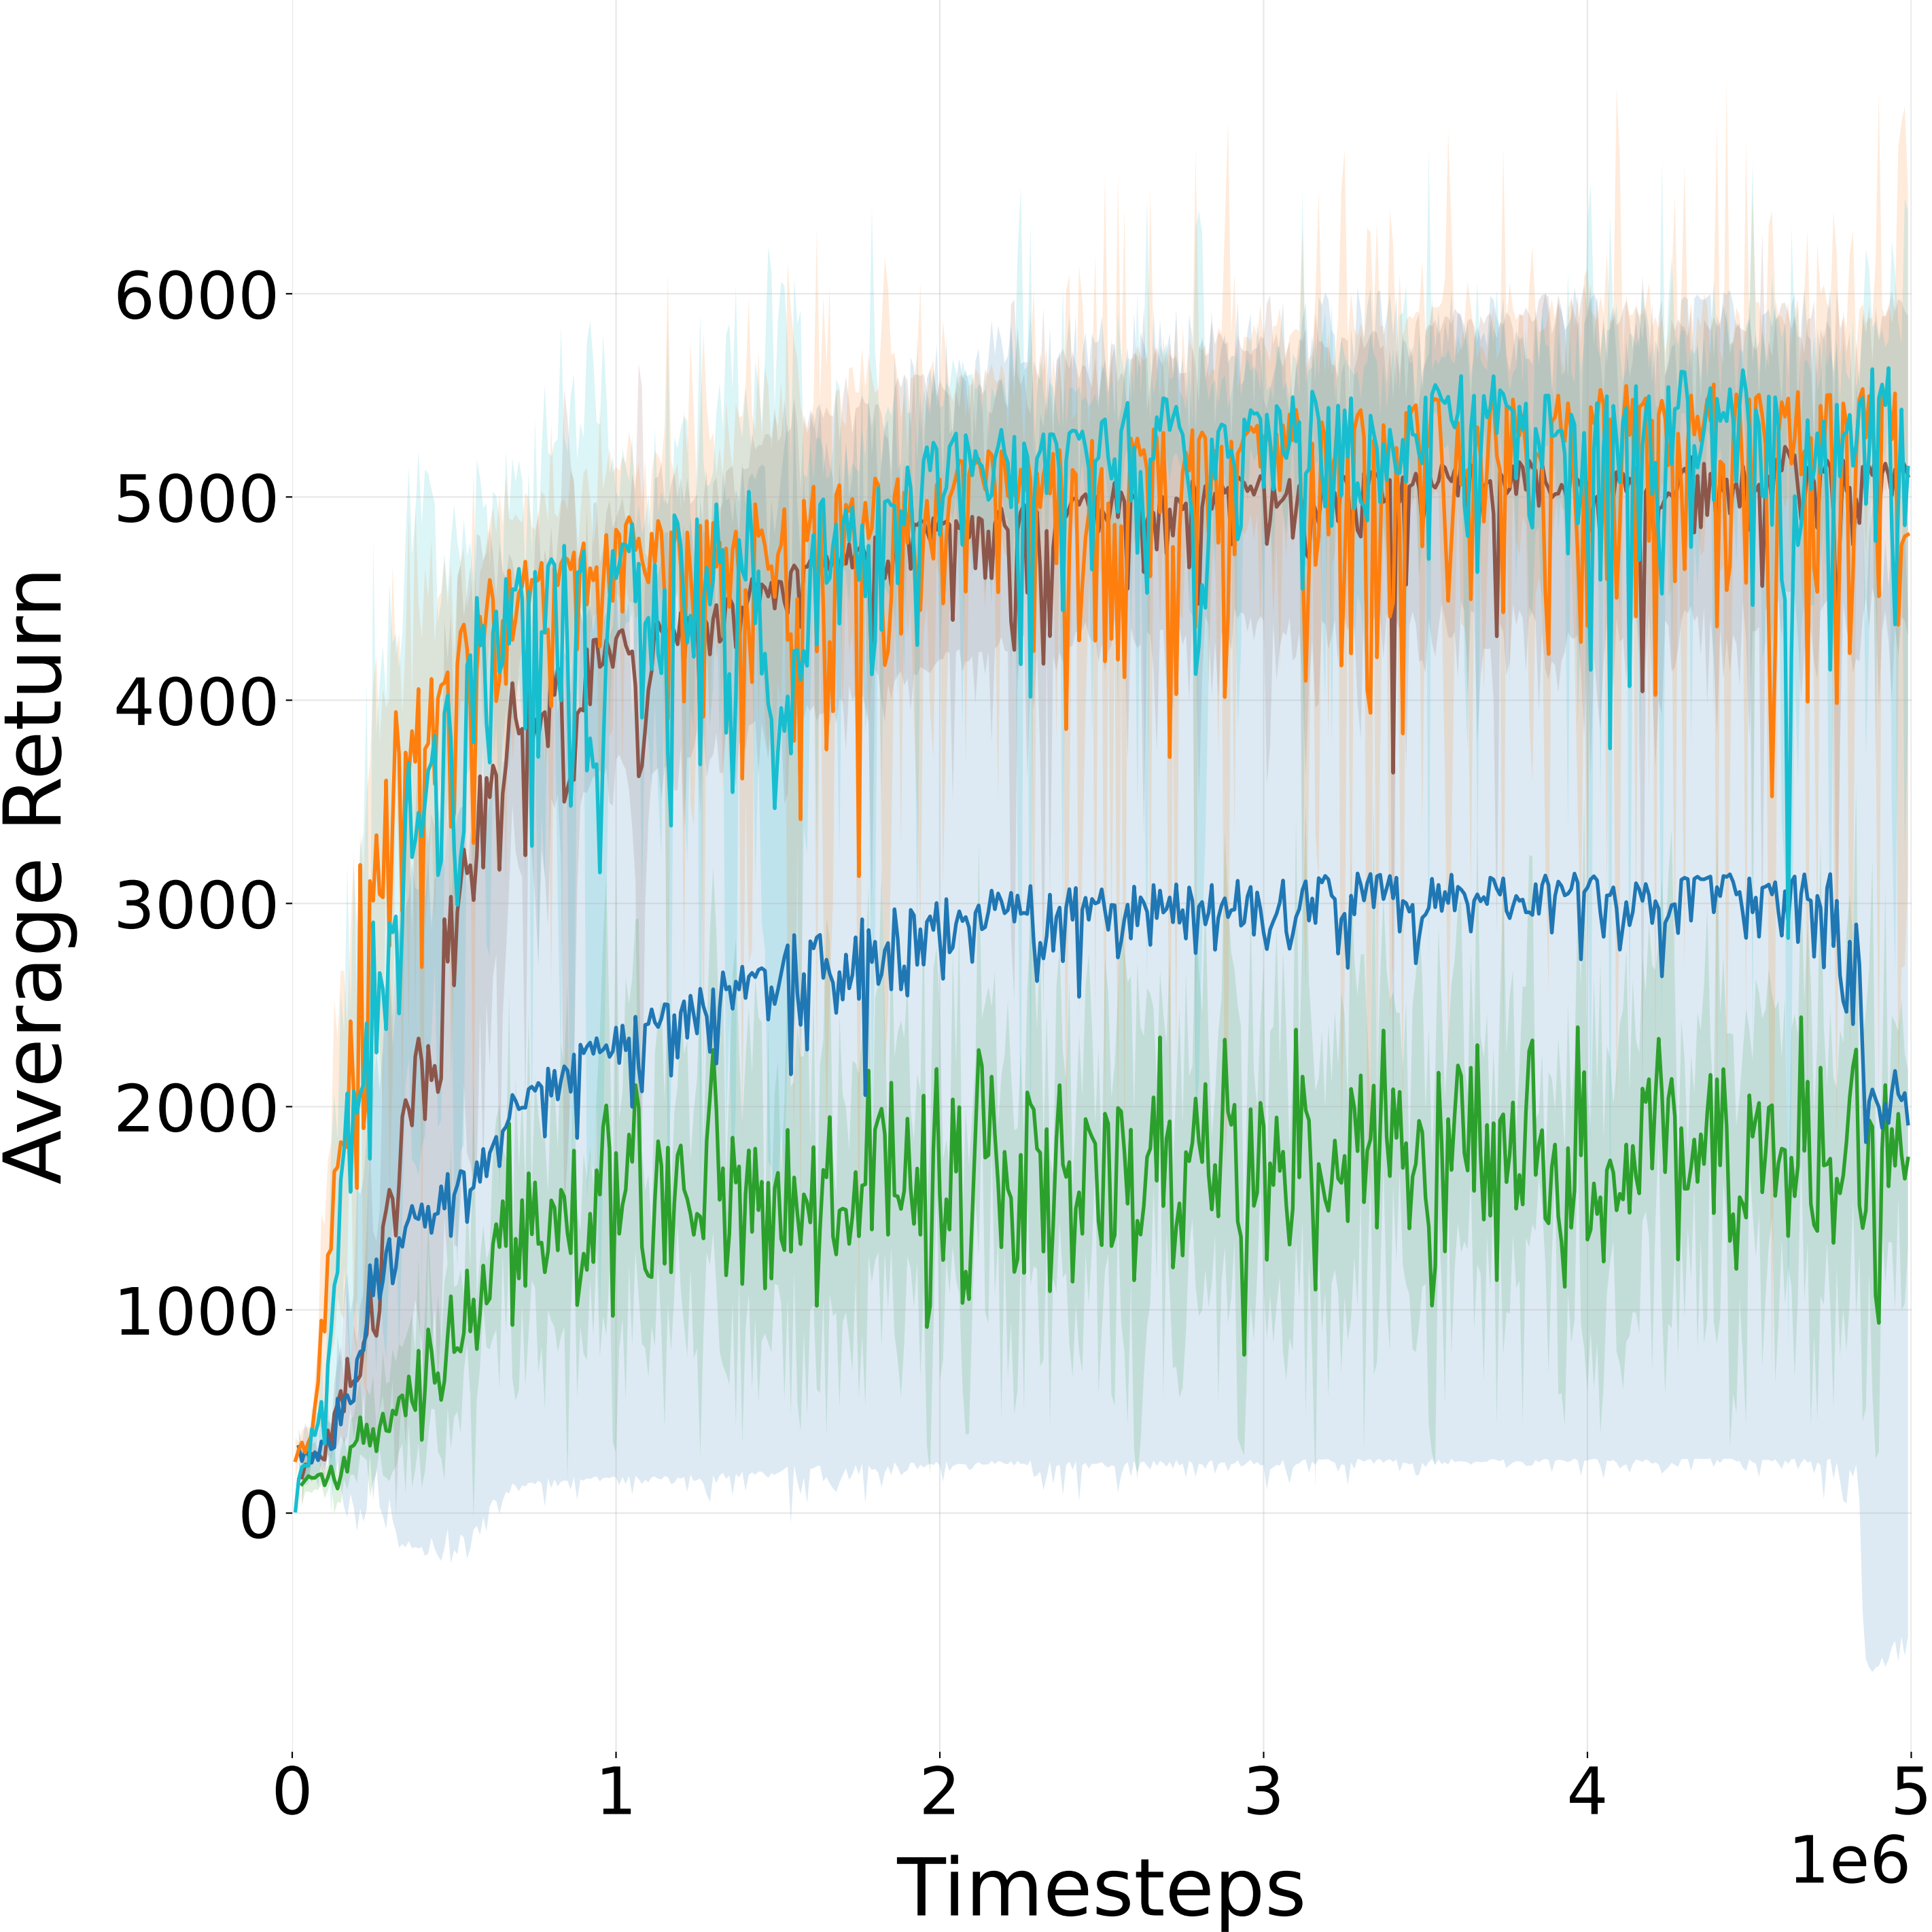

Supplement: supplementary_material [file Walker2d-v4.pdf › FQL/figures/Critic/Walker2d-v4.pdf]

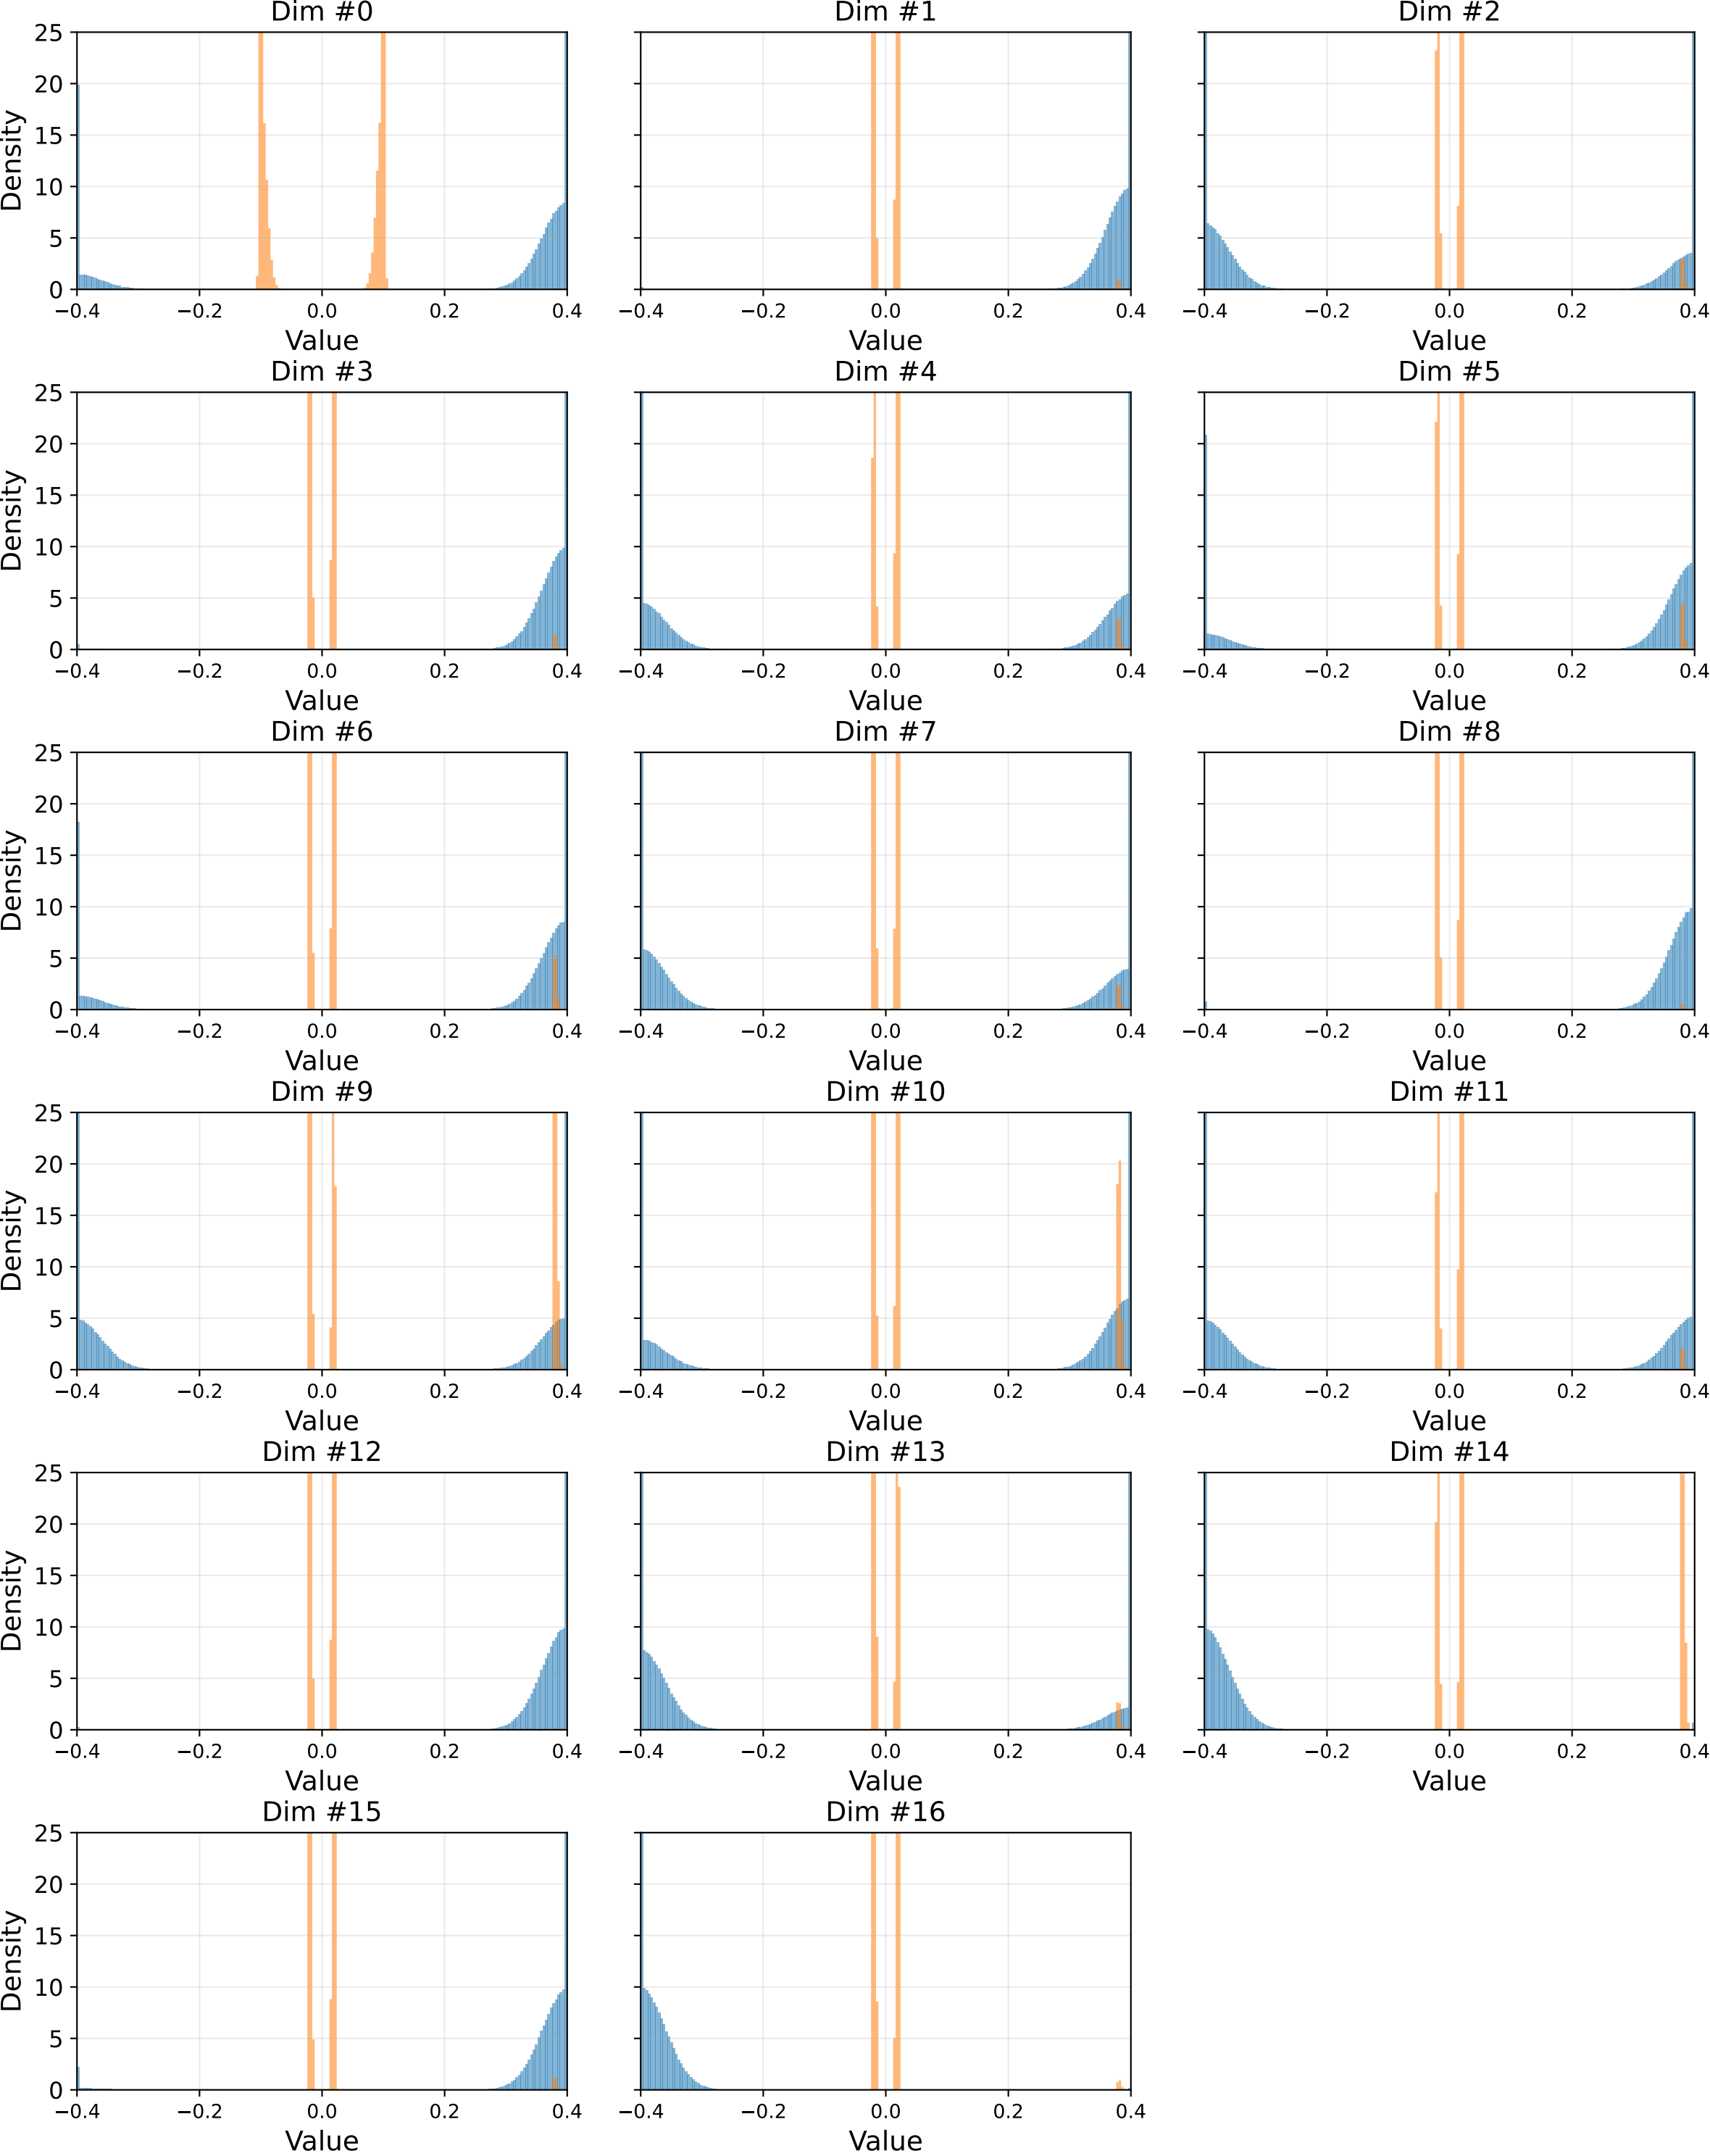

Supplement: supplementary_material [file Humanoid-v4_distribution.pdf › FQL/figures/Distribution/Humanoid-v4_distribution.pdf]

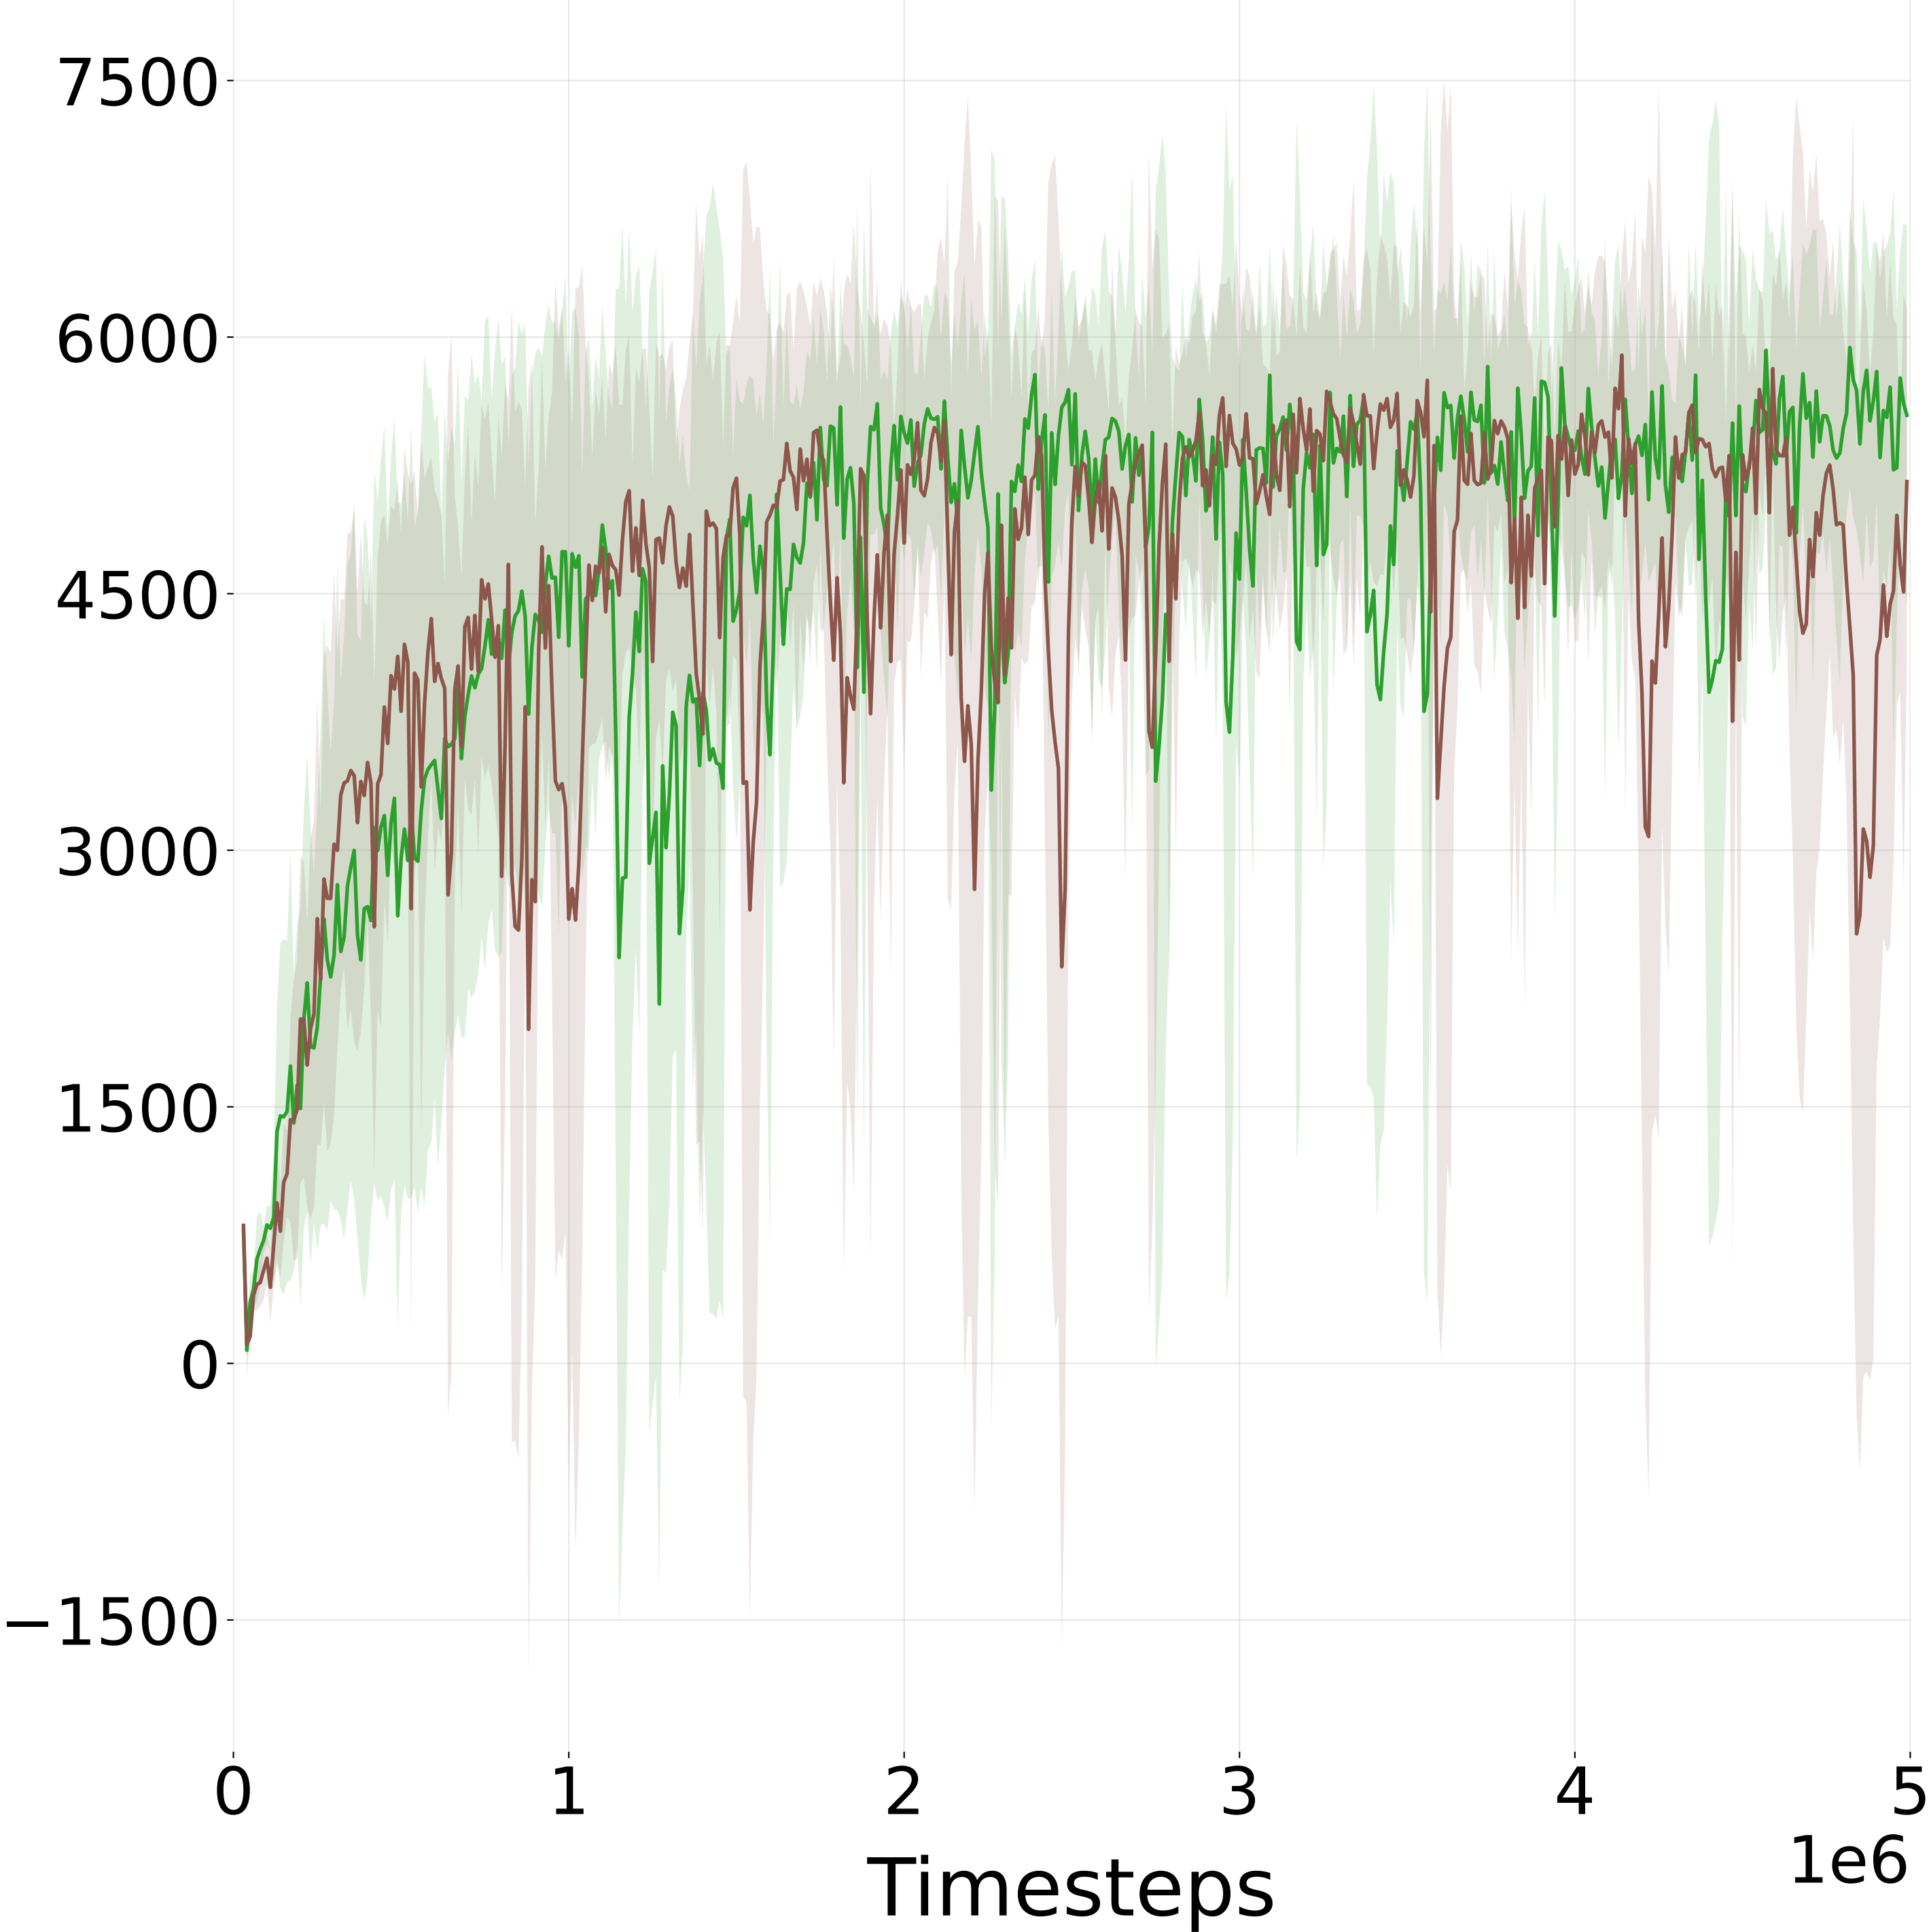

Supplement: supplementary_material [file Ant-v4_method.pdf › FQL/figures/Method/Ant-v4_method.pdf]

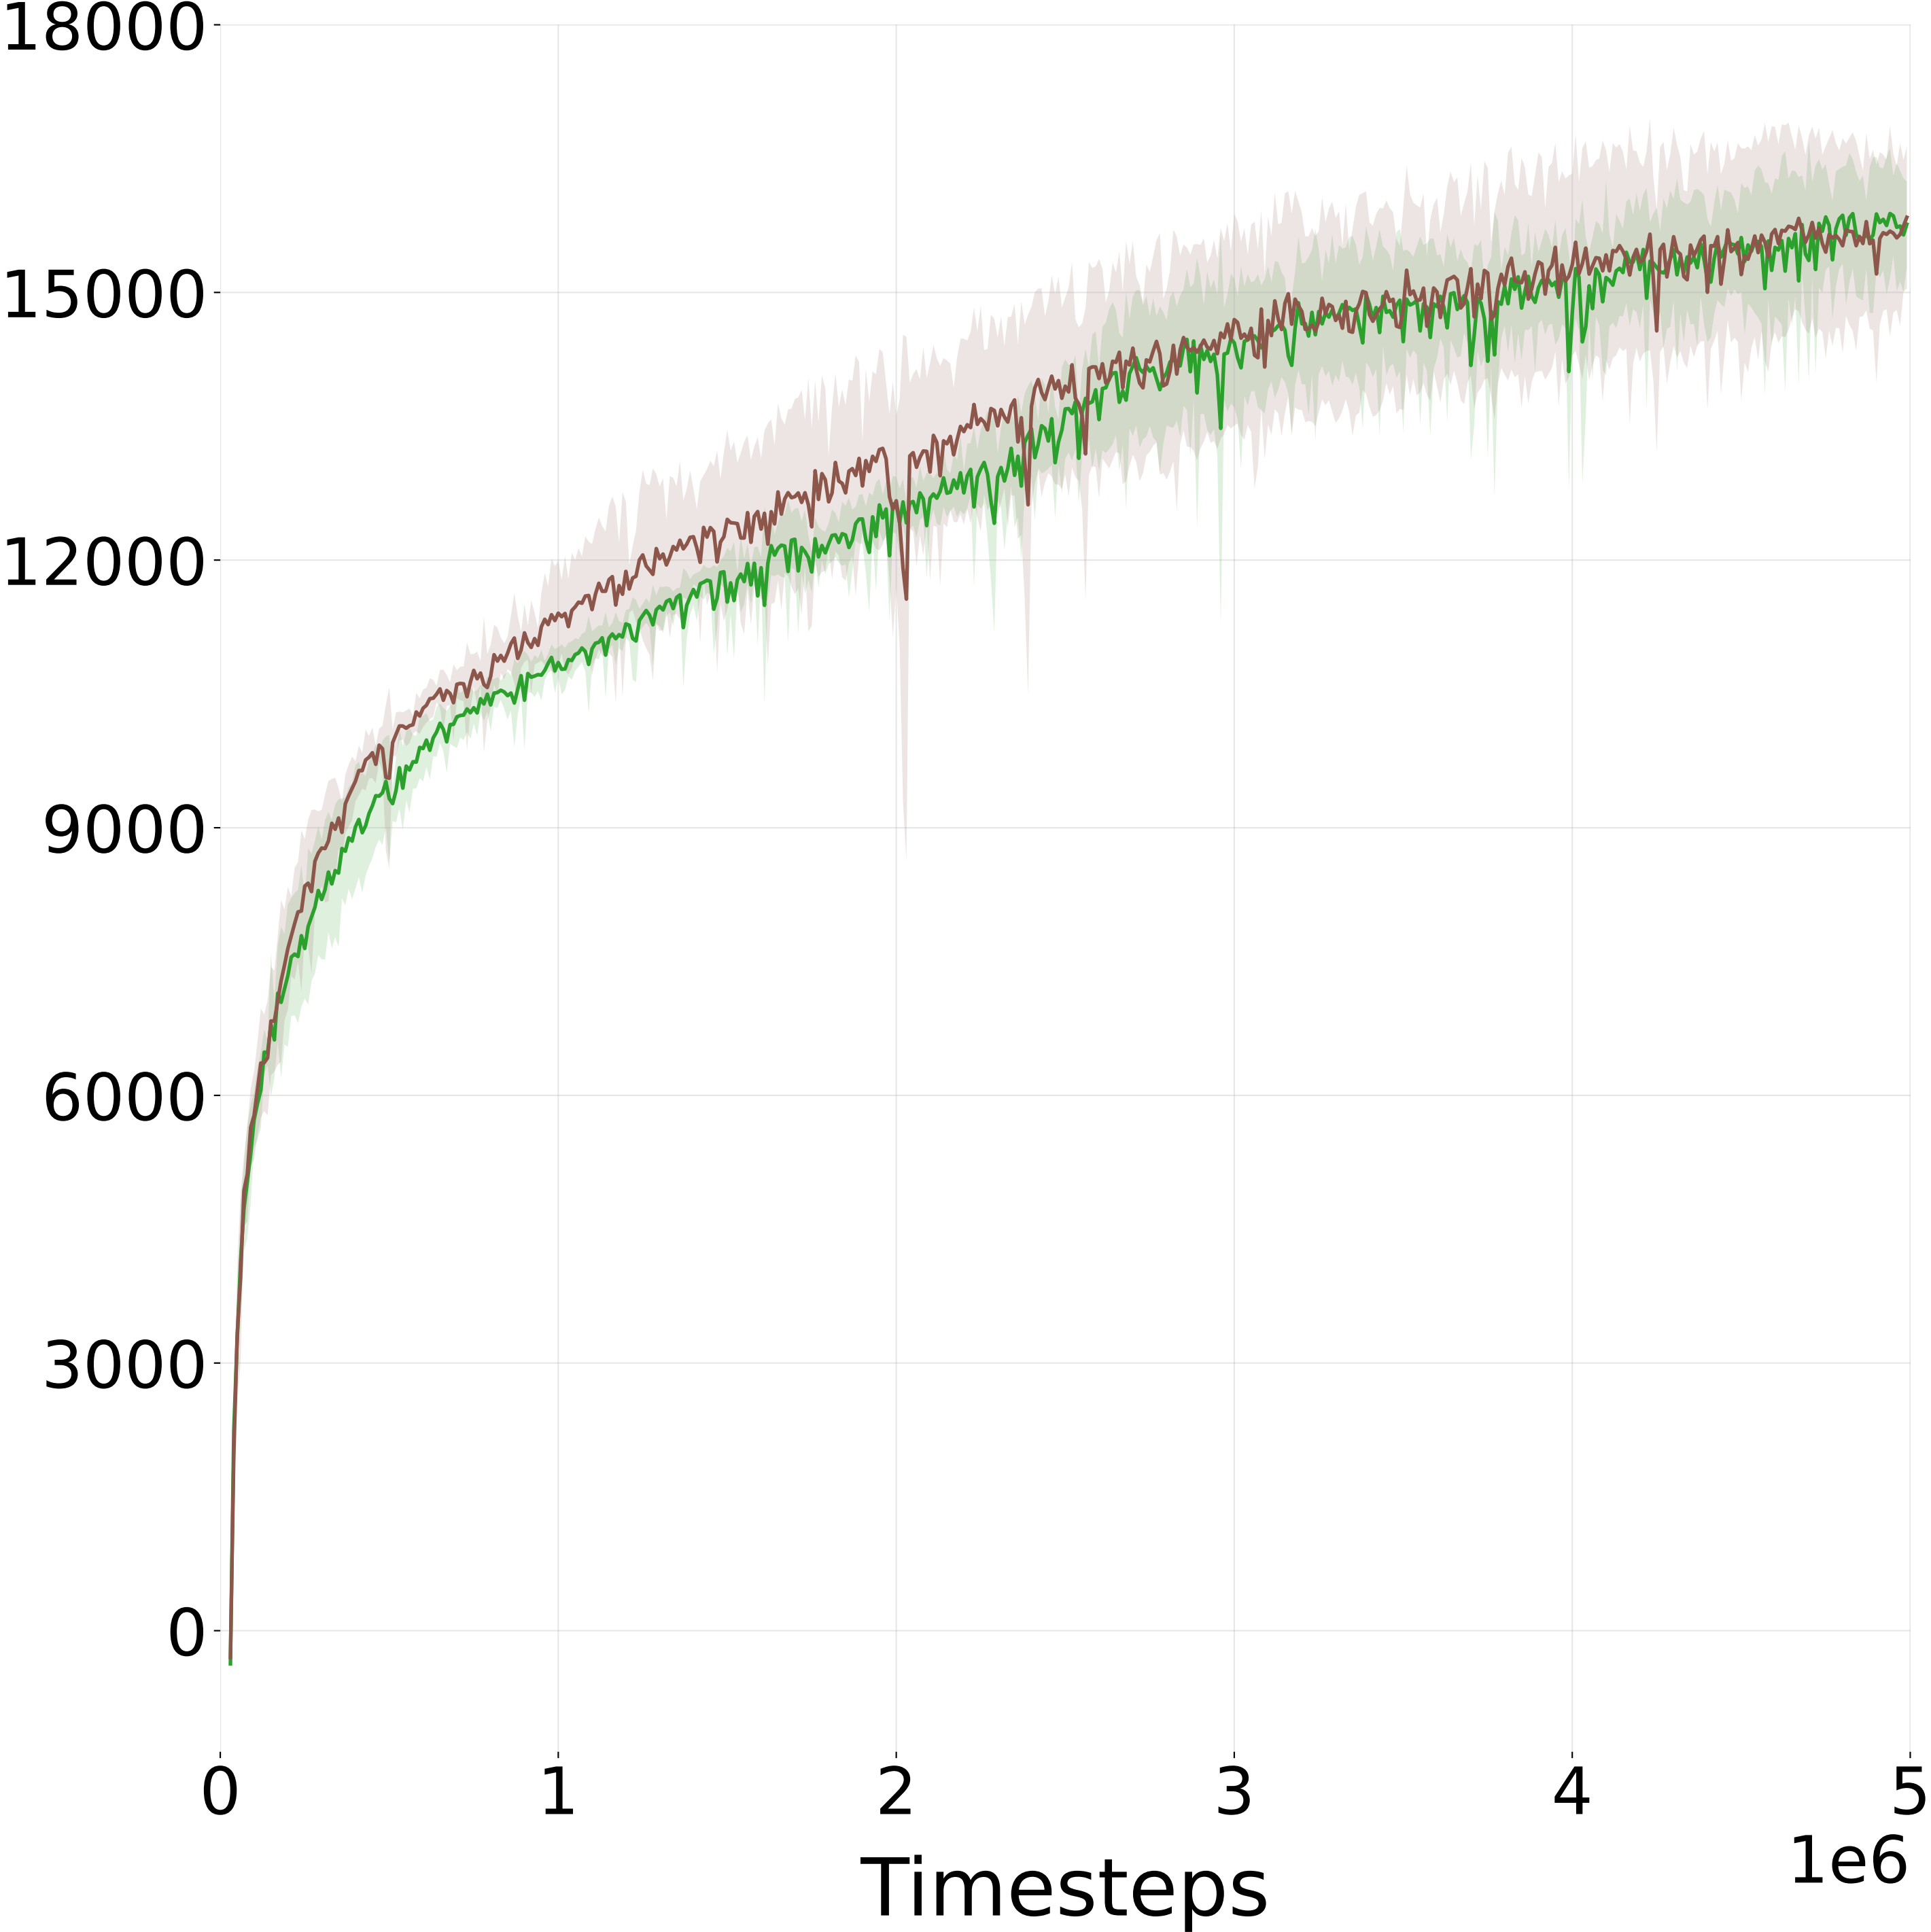

Supplement: supplementary_material [file HalfCheetah-v4_method.pdf › FQL/figures/Method/HalfCheetah-v4_method.pdf]

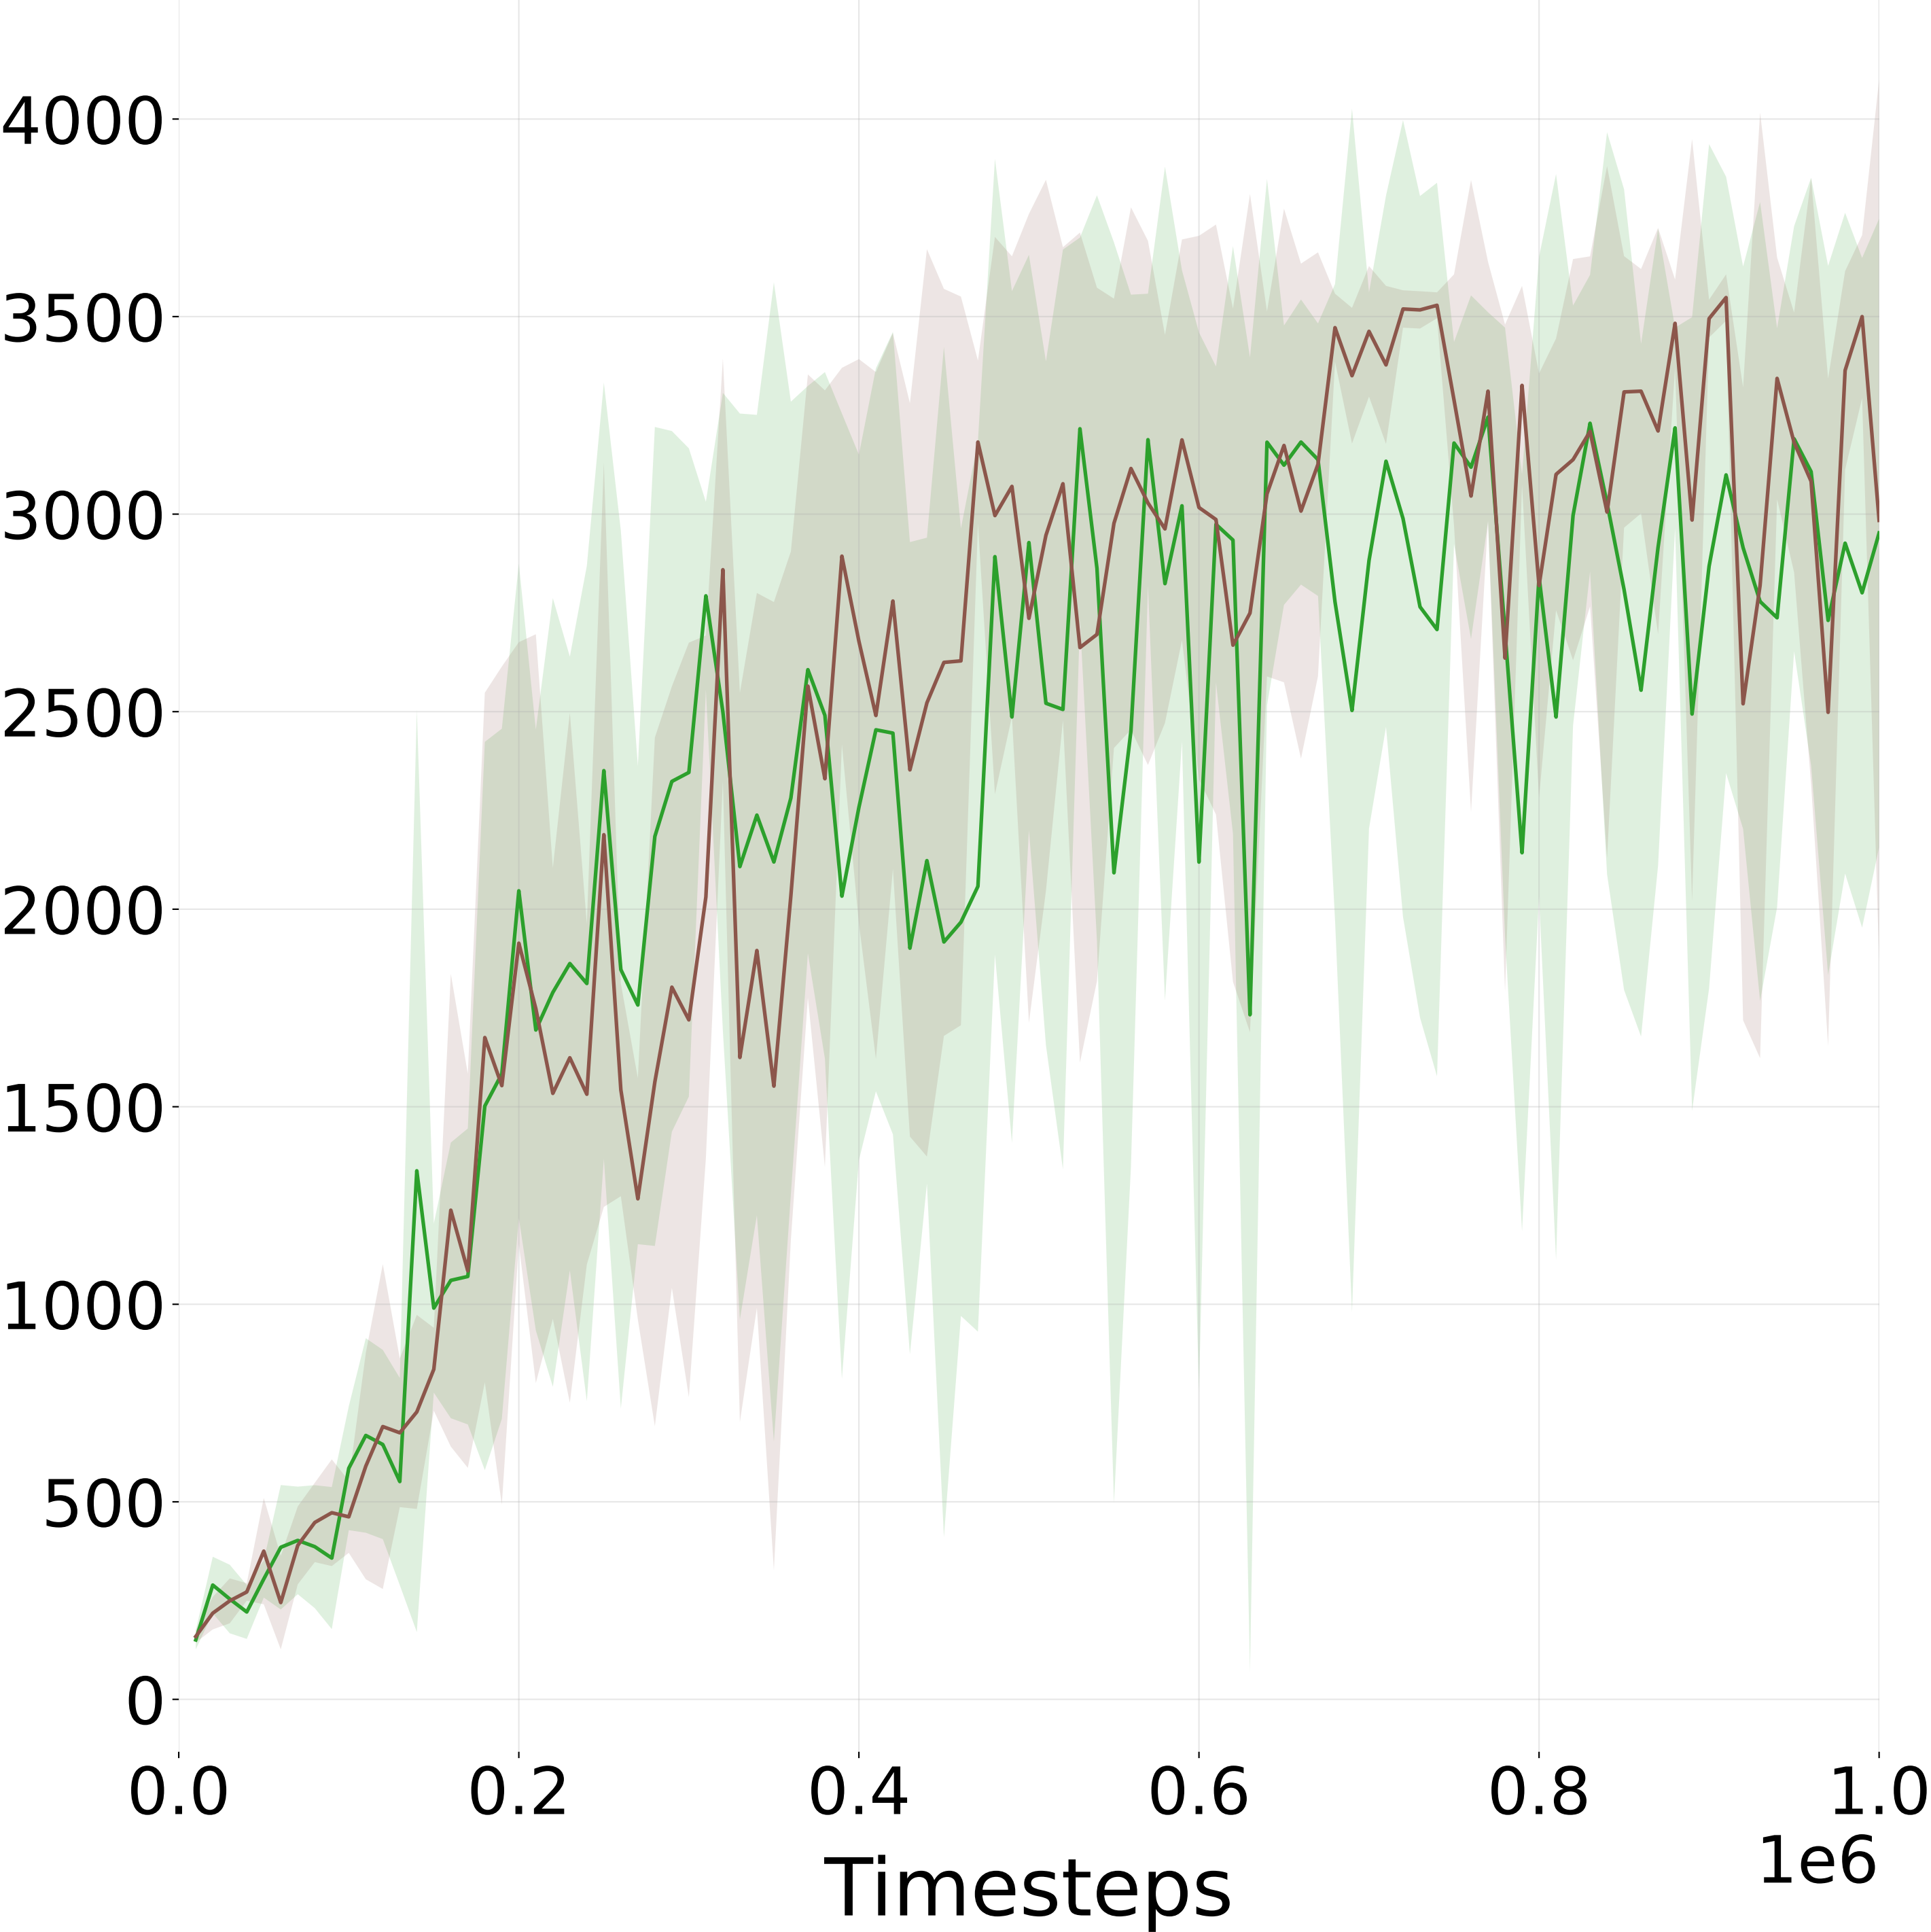

Supplement: supplementary_material [file Hopper-v4_method.pdf › FQL/figures/Method/Hopper-v4_method.pdf]

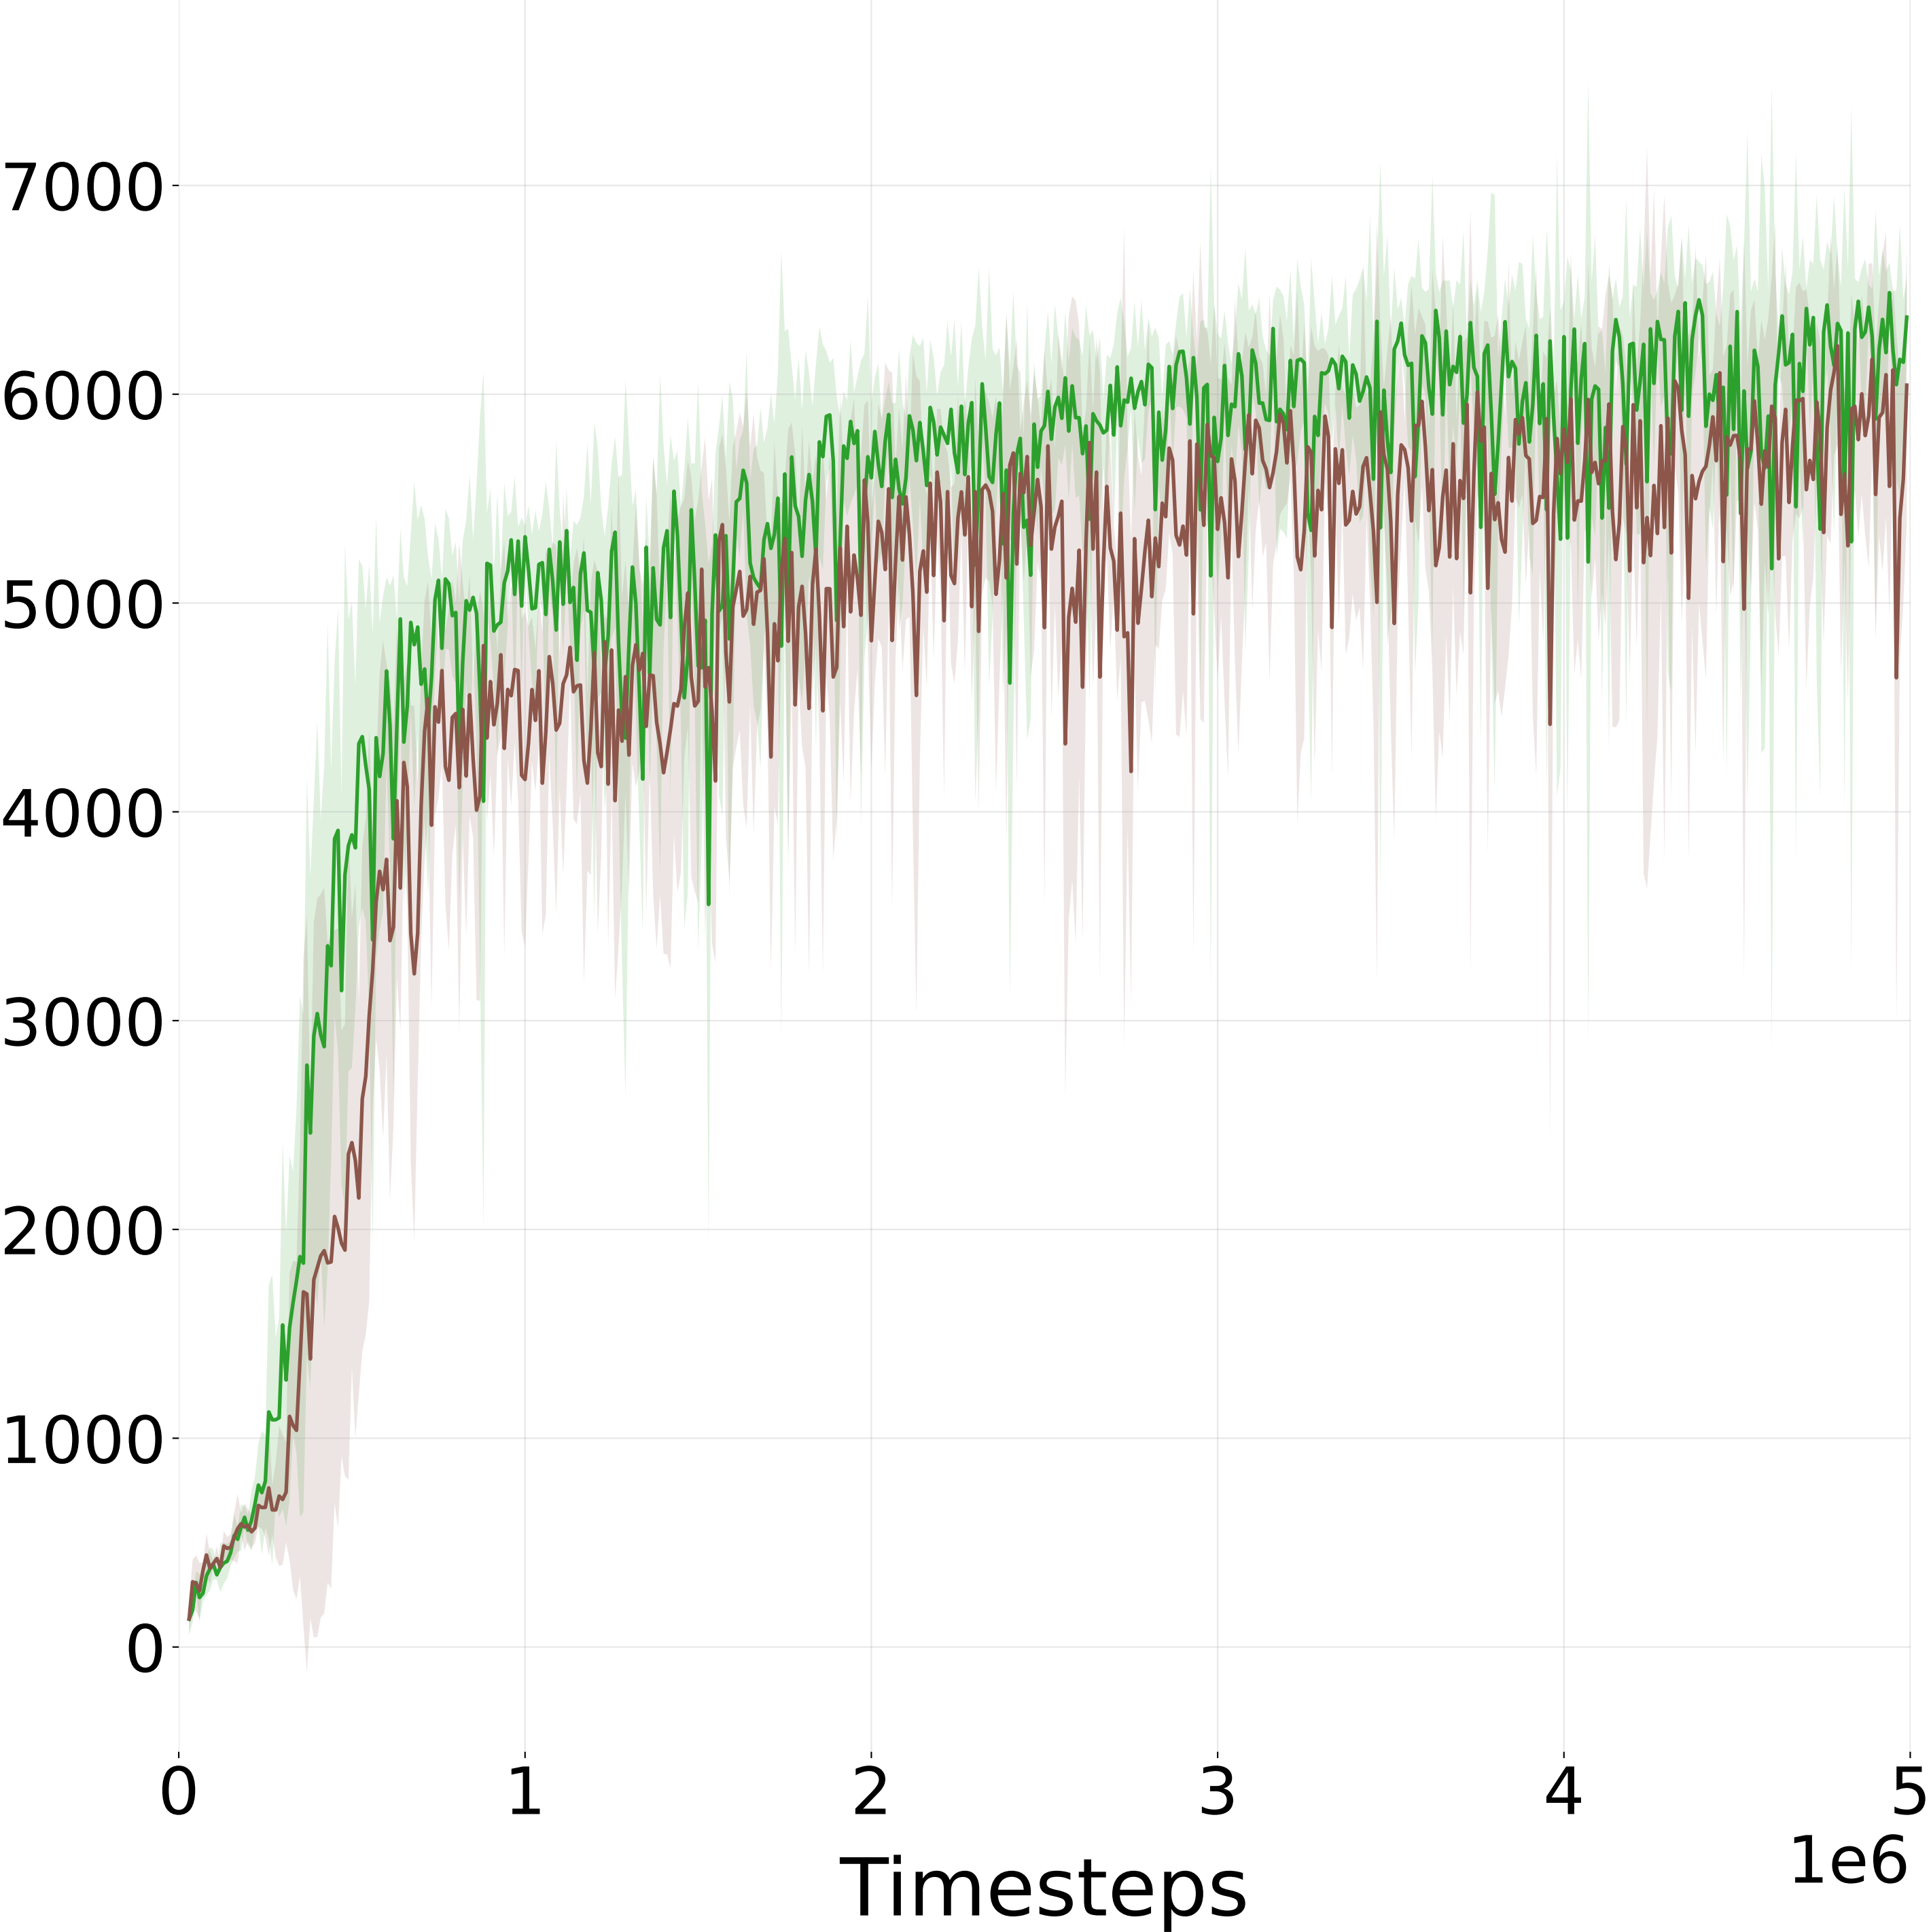

Supplement: supplementary_material [file Humanoid-v4_method.pdf › FQL/figures/Method/Humanoid-v4_method.pdf]

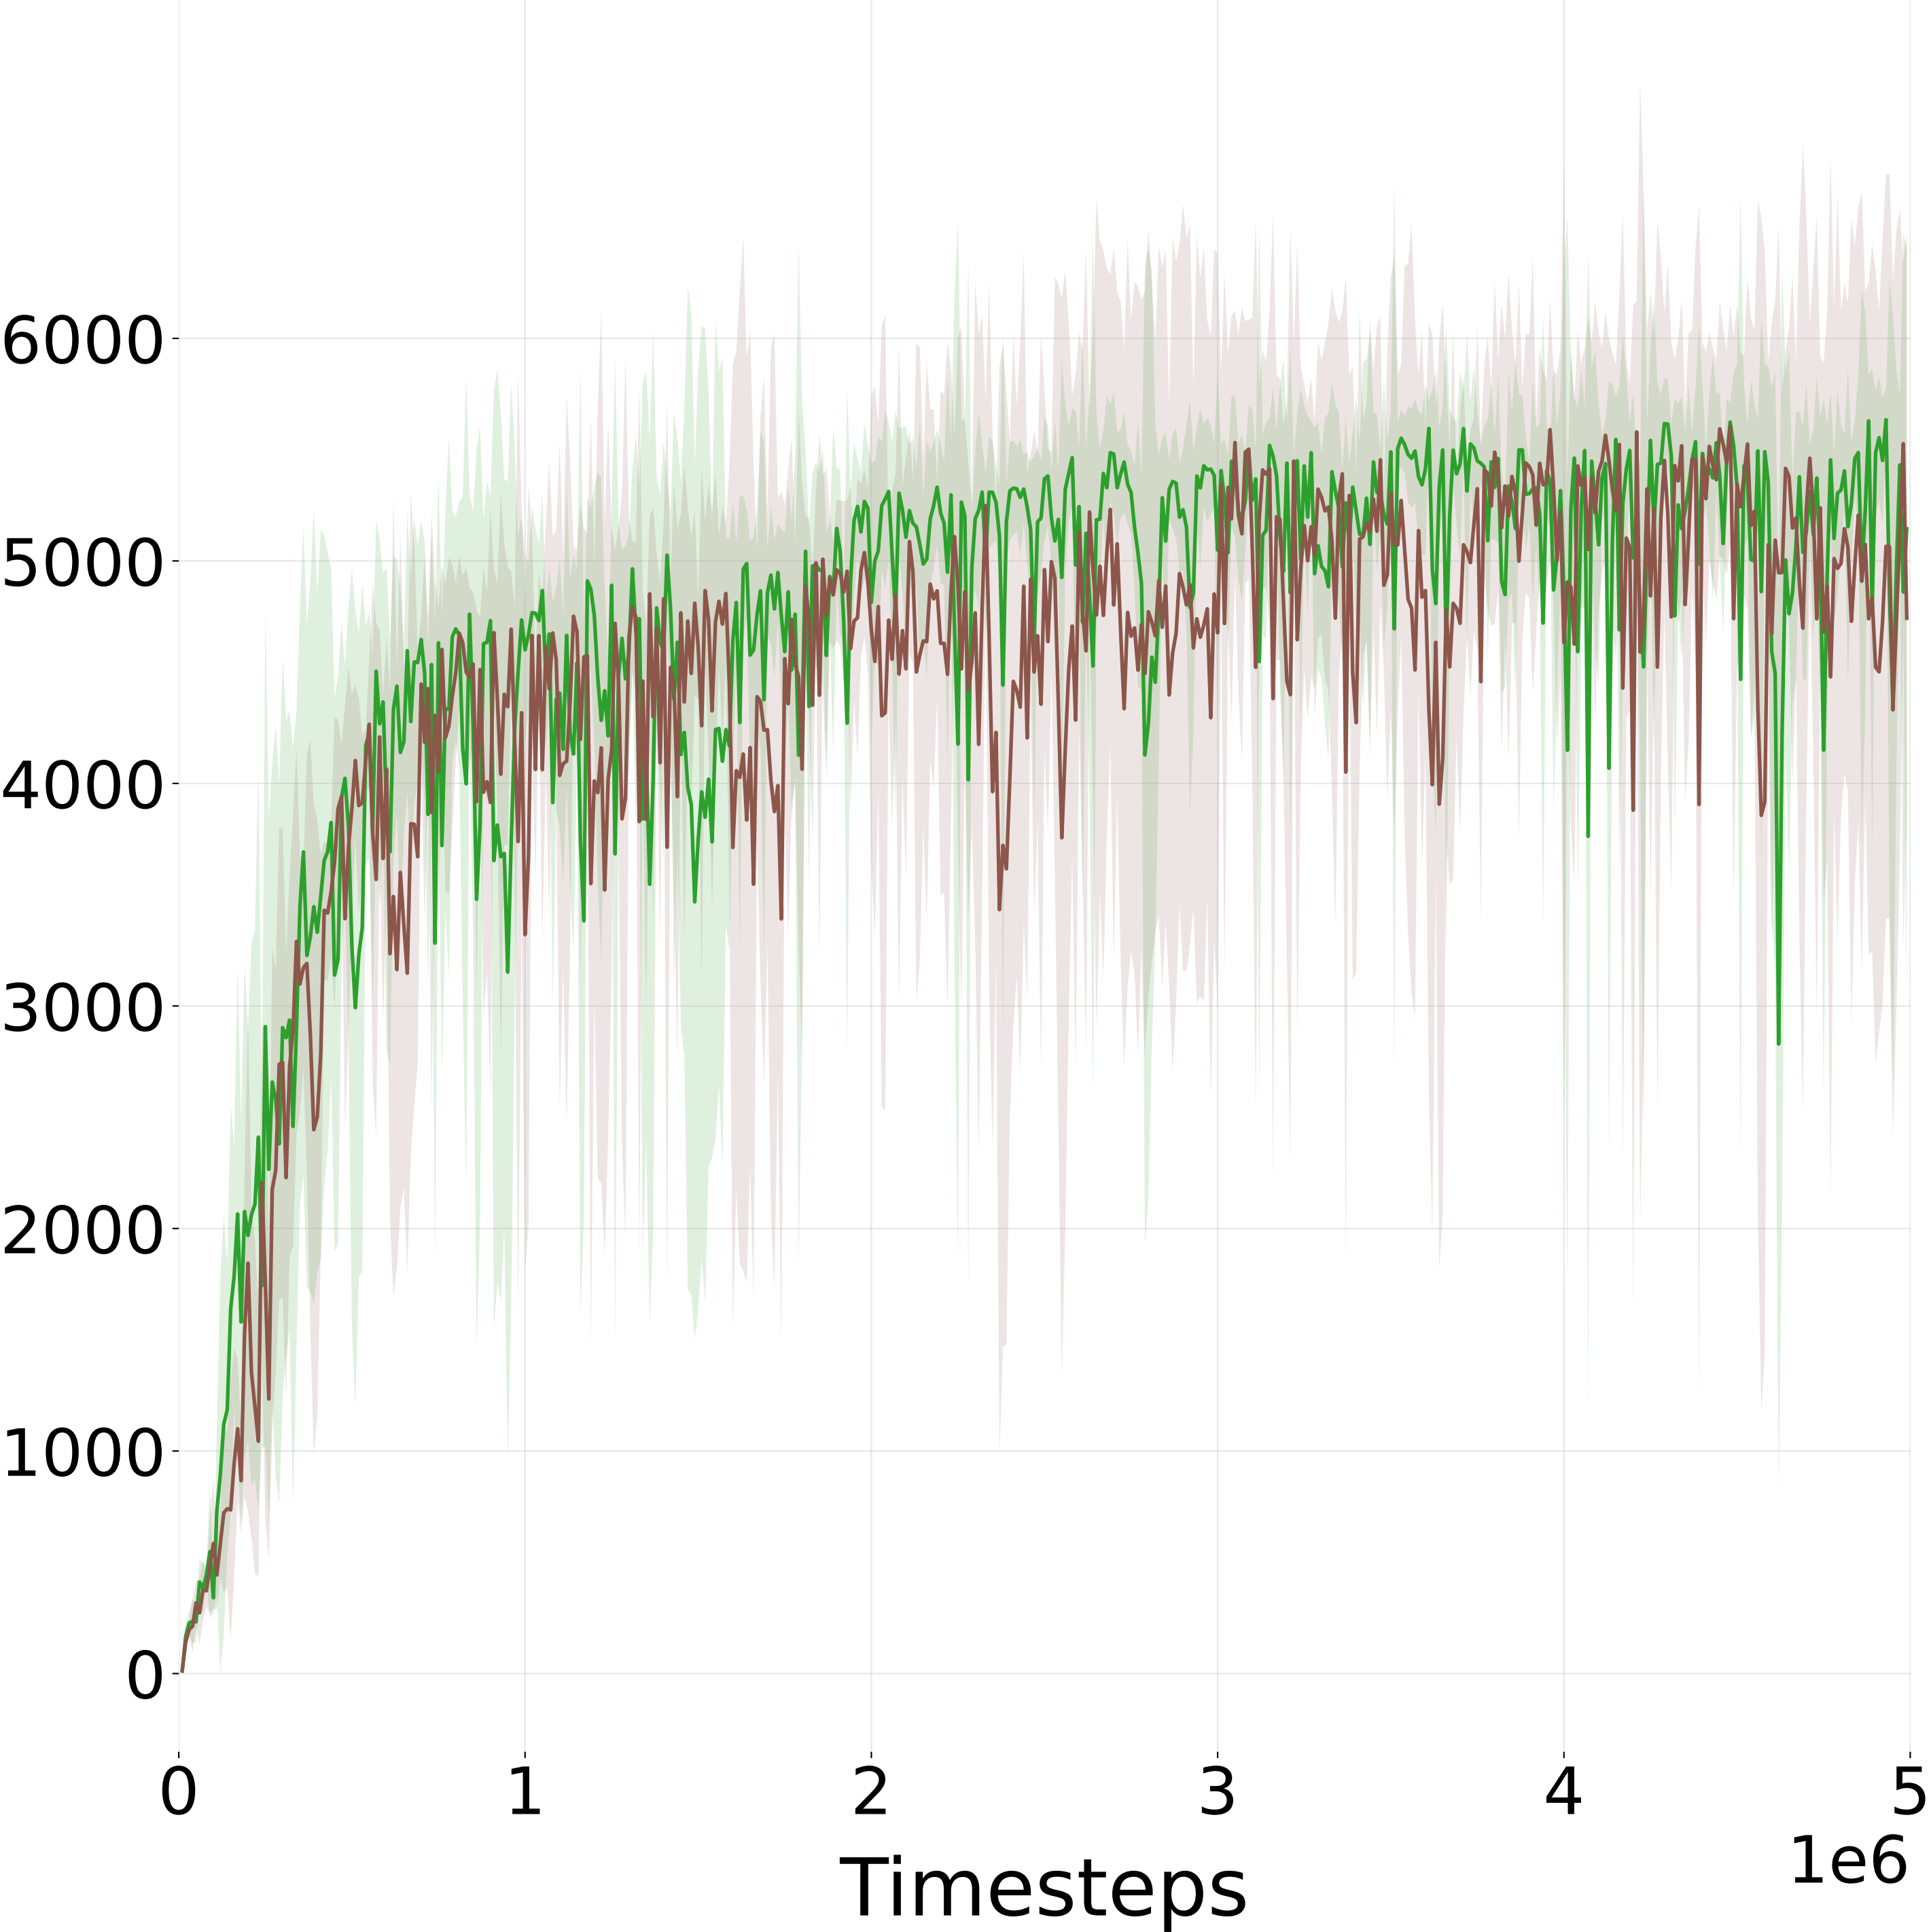

Supplement: supplementary_material [file Walker2d-v4_method.pdf › FQL/figures/Method/Walker2d-v4_method.pdf]
